# A novel metabarcoding strategy for studying nematode communities

Md. Maniruzzaman Sikder<sup>1, 2</sup>, Mette Vestergård<sup>1</sup>, Rumakanta Sapkota<sup>3</sup>, Tina Kyndt<sup>4</sup>,  
Mogens Nicolaisen<sup>1\*</sup>

<sup>1</sup>Department of Agroecology, Aarhus University, Slagelse, Denmark

<sup>2</sup>Department of Botany, Jahangirnagar University, Savar, Dhaka, Bangladesh

<sup>3</sup>Department of Environmental Science, Aarhus University, Roskilde, Denmark

<sup>4</sup>Department of Biotechnology, Ghent University, Ghent, Belgium

\*Corresponding author

Email: mn@agro.au.dk

## Abstract

Nematodes are widely abundant soil metazoa and often referred to as indicators of soil health. While recent advances in next-generation sequencing technologies have accelerated research in microbial ecology, the ecology of nematodes remains poorly elucidated, partly due to the lack of reliable and validated sequencing strategies. Objectives of the present study were (i) to compare commonly used primer sets and to identify the most suitable primer set for metabarcoding of nematodes; (ii) to establish and validate a high-throughput sequencing strategy for nematodes using Illumina paired-end sequencing. In this study, we tested four

24 primer sets for amplicon sequencing: JB3/JB5 (mitochondrial, I3-M11 partition);  
25 SSU\_04F/SSU\_22R (18S rRNA, V1-V2 region); Nemf/18Sr2b (18S rRNA, V6-V8 region) from  
26 earlier studies; and MMSF/MMSR (18S rRNA, V4-V5 region), a newly developed primer set  
27 from this study. In order to test the primer sets, we used 22 samples of individual nematode  
28 species, 20 mock communities, 20 soil samples, 20 spiked soil samples (mock communities  
29 in soil), and 4 root/rhizosphere soil samples. We successfully amplified the target regions (I3-  
30 M11 partition of the COI gene; V1-V2, V4-V8 region of 18S rRNA gene) from these 86 DNA  
31 samples with the four different primer combinations and sequenced the amplicons on an  
32 Illumina MiSeq sequencing platform. We found that the MMSF/MMSR and Nemf/18Sr2b were  
33 efficient in detecting nematode compared to JB and SSU primer sets based on annotation of  
34 sequence reads at genus and in some cases at species level. Therefore, these primer sets  
35 are suggested for studies of nematode communities in agricultural environments.

36 **Keywords:** nematode diversity, soil, plant, rhizosphere, environmental, NGS, sequencing,  
37 primer design.

## 38 **Background**

39 Nematodes are highly diverse and abundant metazoans with worldwide distribution [1].  
40 Generally, nematologists have relied on classical morphology-based taxonomy along with  
41 biochemical or molecular methods for nematode identification [2, 3]. Morphological  
42 identification is difficult, requires taxonomic expertise and often becomes challenging when it  
43 comes to identifying nematodes at lower taxonomic levels [4]. DNA based identification have  
44 eased the task of taxonomic nematode identification in recent years, and most molecular  
45 based diagnostic approaches usually target the nuclear ribosomal DNA region. In addition,  
46 the mitochondrial cytochrome oxidase I gene (COI gene) has been successfully used for  
47 identification of nematodes and for resolving taxonomic relationships among closely related  
48 species [5-7]. For certain groups of taxa, the COI gene has been shown to provide greater  
49 taxonomic resolution compared to the small subunit (SSU, 18S rRNA) rDNA [8]. The potential

50 of COI gene-based barcoding has been explored for nematode taxa ranging from root-knot  
51 nematodes [9], marine nematodes [7], Aphelenchoididae [10] and *Pratylenchus* [11]. Both  
52 marker genes, 18S ribosomal DNA and COI, comes with their own limitations and strengths.  
53 The reference database for COI sequences is less enriched in comparison to 18S, limiting the  
54 implementation of COI barcoding for nematodes. The most inclusive molecular phylogenetic  
55 study of nematodes now available comprised 1215 full-fragment sequences of SSU rDNA [12].  
56 There as several reports on the use of 18S rRNA based barcodes for successful nematode  
57 community analysis, and they resolved several taxonomic issues of identification of several  
58 nematodes [13-15]. Consequently, the 18S rRNA gene may remain the most widely used  
59 molecular marker for identification of nematodes [16, 17].

60 The field of DNA based identification is transitioning from barcoding individual species to  
61 metabarcoding of entire communities. However, the success of metabarcoding approaches  
62 largely relies on suitable primers used for amplification of environmental DNA (eDNA).  
63 Nematode community studies by earlier workers have relied on nematode extraction [18, 19]  
64 to screen out other organisms present in the samples during amplification. This process is  
65 time consuming, laborious and may introduce biases [20]. Therefore, in the present study, we  
66 compared amplification strategies that avoided such nematode isolation steps. In a previous  
67 study, we have already optimized a soil DNA extraction method that we used to evaluate  
68 nematode communities from a number of agricultural soils using the Roche 454 platform [21].  
69 After alignment of 18S rRNA genes of eukaryotic sequences available in the SILVA database,  
70 variable regions V2, V4, and V9 were suggested as the most suitable for biodiversity  
71 assessments [22]. The aims of the present study were (i) to compare commonly used primer  
72 sets from the literature and a newly designed primer set, and identify the most suitable primer  
73 set for metabarcoding of nematodes; (ii) to validate and establish a high-throughput  
74 sequencing strategy for nematodes using Illumina paired-end sequencing from individual  
75 nematode species as well as bulk DNA from soil. For this, we used single nematodes, mock  
76 communities in water and in soil backgrounds, DNA from agricultural fields and from

77 root/rhizosphere samples to validate the primer sets and to test the taxonomic composition of  
78 the communities.

## 79 **Materials and Methods**

### 80 **Primer sets**

81 We selected four primer sets for amplicon sequencing of nematodes (S1 Table). The primer  
82 set SSU\_04F/SSU\_22R (SSU) amplifies the V1-V2 region of the 18S rRNA gene (Fig 1) and  
83 was recently used to describe assemblages of free-living soil nematodes using the MiSeq  
84 platform [17, 23]. We designed a primer set, MMS (MMSF: 5'-GGTGCCAGCAGCCGCGGTA-  
85 3', MMSR: 5'-CTTTAAGT TTCAGCTTTGC-3') located in the variable region V4-V5 of the 18S  
86 rRNA gene (Fig 1). Furthermore, we included the Nemf/18Sr2b primer set (NEM) covering the  
87 V6-V8 regions (Fig 1), which has been used to characterize nematode communities from  
88 agricultural soils using the Roche 454 platform [18, 21, 24]. Finally, we tested a mitochondrial  
89 primer set JB3/JB5 (JB) targeting the I3-M11 region of the COI gene, which has been used to  
90 study nematode communities in agricultural field soils and unmanaged flowerbeds in Japan  
91 [8].

92

93 **Fig 1. Location of metabarcoding primers targeting variable regions in 18S rRNA gene**  
94 **used in the present study.**

### 95 **Nematode species, mock communities and root/ 96 rhizosphere soil samples**

97 In order to test the primer sets, we used 22 nematode species obtained from different  
98 geographical origins (S2 Table) and artificially assembled 10 mock communities using DNA  
99 extracts from these 22 nematodes (named Mock-1, Mock-2 etc.). We combined DNA from the  
100 nematode species in different concentrations (S3 Table). We also tested total DNA extracted  
101 from soil samples collected from 20 agricultural fields in different parts of Denmark. The field  
102 crop history, i.e. the previous crop, status, soil type, and pH was recorded (S4 Table). Soil

103 sampling and DNA extraction from the fields were described earlier [24]. Moreover, we spiked  
104 20 nematode mock communities in DNA extracted from soil. We pooled mock community DNA  
105 with soil DNA in a 1:1 ratio, referred to as soil-mock communities. Furthermore, we included  
106 DNA extracted from washed and freeze-dried root knot nematode (*Meloidogyne incognita*)  
107 infected tomato (*Solanum lycopersicum* L.) roots, quinoa (*Chenopodium quinoa* Willd.) roots,  
108 maize (*Zea mays* L.) roots/rhizosphere soil, and green bean (*Phaseolus vulgaris* L.)  
109 roots/rhizosphere soil.

110

## 111 **DNA extraction, PCR and sequencing strategy**

112 DNA was extracted from 250 mg of the freeze-dried and ground soil samples using the  
113 PowerLyzer soil DNA extraction kit (Qiagen, Germany) according to the manufacturer's  
114 instructions, except that samples were homogenized in a Geno/Grinder 2000 at 1500 rpm for  
115 3 x 30 seconds. For the root/rhizosphere soil samples, DNA was extracted from 20 mg of  
116 ground material with the DNeasy plant mini kit (Qiagen, Germany).

117 To amplify target regions, the first PCR was performed in a reaction mixture of 25  $\mu$ l consisting  
118 of 5  $\mu$ l of Promega 5X reaction buffer, 1.5  $\mu$ l of  $MgCl_2$  (25 mM), 2  $\mu$ l dNTPs (2.5 mM), 0.5  $\mu$ l of  
119 each primer (10  $\mu$ M), 0.125  $\mu$ l of GoTaq Flexi polymerase (5U, Promega Corporation,  
120 Madison, USA) and 2  $\mu$ l of DNA template (approximate 2 ng/ $\mu$ l). PCR cycles for the JB primer  
121 combination were 94°C for 5 min (94°C 1 min, 50°C 30 sec, 72°C 45 sec) 35 cycles, 72°C 10  
122 min, and 4°C on hold [25]. Similar PCR cycles were used except that the annealing  
123 temperature was 53°C for MMS and NEM, and 55°C for the SSU primer set [26]. Each of the  
124 primer sets of the first PCR (S1 Table) were tagged with the Illumina adaptor overhang  
125 nucleotide sequence, for forward primer 5'-TCGTCCGCGCAGCGTCAGATGTGTATAAGAGAC  
126 AG-3' and for reverse primer 5'-GTCTCGTGGGCTCGGAGATGTGTATAAGAGACAG-3'.  
127 After this PCR, we pooled and diluted (1:5) the amplicons.

128 A second PCR was performed for dual indexing. The master mix of this PCR was identical to  
129 the first PCR except that 2  $\mu$ l of DNA template and 2  $\mu$ l of the different combinations of index  
130 primers were used. Each index primer consisted of a sequence specific for Illumina  
131 sequencing, a unique 8 bp multiplex identifier and the Illumina adapter overhang sequence.  
132 The second PCR was performed with the following cycles: 94°C 5 min, (94°C 30 sec, 55°C 30  
133 sec, 72°C 1 min) 13 cycles, 72°C 10 min, and 4°C on hold. All amplicons were visualized by  
134 gel electrophoresis, pooled (approximately equal amounts), precipitated and the pellet  
135 dissolved in DNAase free water. Pooled DNA was run on a gel and amplicons were excised  
136 and purified using the QIAquick Gel Extraction kit (QIAGEN, Germany) according the  
137 manufacturer's instruction. Finally, the DNA concentrations were measured fluorometrically  
138 (Qubit, Thermo Fisher Scientific) and sent for sequencing on an Illumina MiSeq sequencer  
139 with PE300 (Eurofins Genomics, Germany).

140

## 141 **Sequence Analysis**

142 The paired end reads obtained from the Illumina MiSeq runs were analyzed using VSEARCH  
143 version 2.6 [27]. For joining paired-end reads, we used an overlapping minimum read length  
144 of 30 base pairs and reads with quality Phred scores <30 were removed. Internal barcodes,  
145 forward and reverse primers, and reads less than 200 base pairs were also excluded.  
146 Following this, sequences were dereplicated, screened for chimeras and clustered at 99%  
147 similarity level using VSEARCH. Taxonomy assignments for the clustered operational  
148 taxonomic units (OTUs) were done using the SILVA 132 reference database [28, 29] for  
149 eukaryotes in QIIME using `assign_taxonomy.py` [30]. Moreover, all nematode OTUs were  
150 blasted ( $\geq$  98% similarity) against the NCBI GenBank database to reconfirm their taxonomic  
151 assignment. Statistics and data visualization were carried out using the statistical package R.

152

## 153 Results

### 154 Data characteristics

155 We successfully obtained sequence reads from 22 individual nematodes species, 20 different  
156 mock communities with and without a soil background, 20 different soils and 4  
157 roots/rhizosphere soil samples using the four primer sets. In total, 18.2 million sequence reads  
158 were obtained. After quality control, sequence reads were clustered into 320, 17734, 874 and  
159 313 OTUs at 99% similarity for JB, SSU, MMS and NEM primer sets, respectively.

### 160 Sequencing of individual nematode species

161 For the individual nematode species, we could annotate 10 of the 22 samples to species level  
162 and nine to genus level with the JB primer set, whereas three species were not amplified with  
163 this primer set (Table 1). Using the SSU primer set, only 15 out of the 22 nematode species  
164 were amplified. The MMS primer set amplified all nematodes except *Meloidogyne graminicola*  
165 (Table 1). This primer set identified *Meloidogyne* at the genus level, and the other nine  
166 nematodes were assigned at species level. The NEM primer set successfully amplified all the  
167 nematode species used in our study. *Meloidogyne* species were assigned to genus level and  
168 cyst nematodes (*Heterodera carotae* and *H. schachtii*) could only be identified at family level  
169 (Table 1). The remaining five nematodes were detected at the species level.

170

171 **Table 1. The efficiency of four metabarcoding primer sets in detection of individual**  
172 **nematode species.** NCBI Blast tool was used for taxonomic assignments, and top hits with  
173 sequence similarities  $\geq 99\%$  and coverage 100% were considered for taxonomic assignment  
174 at species level.

175

| Nematode taxa                  | JB                      | SSU                     | MMS                     | NEM     |
|--------------------------------|-------------------------|-------------------------|-------------------------|---------|
| <i>Meloidogyne incognita</i>   | Genus                   | Genus                   | Genus                   | Genus   |
| <i>Meloidogyne arenaria</i>    | Genus                   | Genus                   | Genus                   | Genus   |
| <i>Meloidogyne javanica</i>    | Genus                   | Genus                   | Genus                   | Genus   |
| <i>Meloidogyne graminicola</i> | Genus                   | <b>Not<br/>Detected</b> | <b>Not<br/>Detected</b> | Genus   |
| <i>Meloidogyne ethiopica</i>   | Genus                   | Genus                   | Genus                   | Genus   |
| <i>Meloidogyne inornata</i>    | Genus                   | Genus                   | Genus                   | Genus   |
| <i>Meloidogyne ulmi</i>        | Genus                   | Genus                   | Genus                   | Genus   |
| <i>Meloidogyne luci</i>        | Genus                   | Genus                   | Genus                   | Genus   |
| <i>Root knot nematodes</i>     | Genus                   | Genus                   | Genus                   | Genus   |
| <i>Meloidogyne enterolobi</i>  | Species                 | <b>Not<br/>Detected</b> | Genus                   | Genus   |
| <i>Meloidogyne chitwoodi</i>   | Species                 | Genus                   | Genus                   | Genus   |
| <i>Meloidogyne fallax</i>      | Species                 | Genus                   | Genus                   | Genus   |
| <i>Meloidogyne minor</i>       | Species                 | Species                 | Genus                   | Genus   |
| <i>Meloidogyne naasi</i>       | Species                 | <b>Not<br/>Detected</b> | Genus                   | Species |
| <i>Pratylenchus penetrans</i>  | Species                 | <b>Not<br/>Detected</b> | Species                 | Species |
| <i>Pratylenchus neglectus</i>  | Species                 | <b>Not<br/>Detected</b> | Species                 | Genus   |
| <i>Heterodera carotae</i>      | <b>Not<br/>Detected</b> | <b>Not<br/>Detected</b> | Species                 | Family  |



|                                    |                     |                     |         |         |
|------------------------------------|---------------------|---------------------|---------|---------|
| <i>Heterodera schachtii</i>        | Species             | Species             | Species | Family  |
| <i>Belonolaimus longiscaudatus</i> | <b>Not Detected</b> | Species             | Species | Species |
| <i>Bursaphelenchus mucronatus</i>  | Species             | <b>Not Detected</b> | Species | Species |
| <i>Caenorhabditis elegans</i>      | Species             | Species             | Species | Genus   |
| <i>Ditylenchus dipsaci</i>         | <b>Not Detected</b> | Species             | Species | Species |

176

## 177 **Mock communities and mock communities in soil**

178 In mock communities, JB produced sequences were assigned to genus level within the  
179 families Meloidogynidae and Heteroderidae, and to species level within Pratylenchidae and  
180 Rhabditidae (Table 2). However, one-third (33%) of the dataset remained unassigned (S1  
181 Fig), and nematodes from Dolichodoridae were not amplified (Table 2). The SSU primer set  
182 generated sequences that were assigned to genus level within the Meloidogynidae and  
183 Heteroderidae, whereas sequences within Rhabditidae were assigned to species level. The  
184 SSU primers failed to amplify nematodes from Pratylenchidae and Dolichodoridae (Table 2).  
185 The MMS primer pair generated Meloidogynidae sequences that could be assigned to genus  
186 level and for the other three families, Heteroderidae, Dolichodoridae, and Rhabditidae  
187 sequences were assigned to species level (Table 2). The NEM primer set was able to amplify  
188 and sequence nematodes to the genus level within Meloidogynidae, to species level within  
189 Pratylenchidae, Dolichodoridae and Rhabditidae, and to family level within Heteroderidae  
190 (Table 2). In the mock communities including diluted DNA of individual nematodes, we  
191 observed lower relative abundance of diluted taxa compared to undiluted taxa; however,  
192 diluted samples were generally detected in unexpectedly high amounts (S2 and S3 Figs).

193

194 **Table 2. The efficiency of four metabarcoding primers in detection of nematodes in**  
195 **mock communities based on BLAST searches.** Only taxonomic assignments appearing in  
196 top hits and with sequence similarities  $\geq 99\%$  and coverage 100% were considered.

| <b>Mock communities</b> | <b>JB</b>           | <b>SSU</b>          | <b>MMS</b>          | <b>NEM</b> |
|-------------------------|---------------------|---------------------|---------------------|------------|
| <b>Meloidogynidae</b>   | Genus               | Genus               | Genus               | Genus      |
| <b>Heteroderidae</b>    | Genus               | Species             | Species             | Family     |
| <b>Pratylenchidae</b>   | Species             | <b>Not detected</b> | <b>Not detected</b> | Species    |
| <b>Dolichodoridae</b>   | <b>Not detected</b> | <b>Not detected</b> | Species             | Species    |
| <b>Rhabditidae</b>      | Species             | Species             | Species             | Species    |

197  
198 In soil-mock combinations, reads from nematodes from the mock communities were generally  
199 highly abundant compared to reads from the nematodes derived from the soil background (S5  
200 Table). The JB primer pair only detected nematode families from the mock communities and  
201 no additional sequences from the soil background were detected. The SSU primer set was  
202 able to detect nematodes belonging to three families (Meloidogynidae, Heteroderidae and  
203 Rhabditidae) of the mock communities. Both the MMS and NEM primer sets detected  
204 nematodes of the families represented in the mock communities and additionally other  
205 nematode families from the spiked soil samples.

## 206 **Nematode communities in soil samples**

207 For the JB primer set, 4% and 31% of the total number of sequence reads were classified as  
208 Nematoda in soil and plant root/rhizosphere soil samples, respectively, while many sequence  
209 reads were unassigned (Fig 2). For the SSU primer set, only 1% of the sequence reads were  
210 classified as Nematoda, both in soil and plant root/rhizosphere soil samples (Fig 2). This  
211 primer set detected a broad spectrum of other eukaryotes such as fungi, plant, Cercozoa and  
212 Charophyta. For the newly designed primer pair (MMSF/MMSR), 17% and 34% of total

213 sequence reads belonged to Nematoda (Fig 2), and for the NEM primer set, 74% and 99% of  
214 the total sequences belonged to Nematoda in the soil and plant root/rhizosphere soil samples,  
215 respectively (Fig 2).

216 We are not presenting any further results for the JB and SSU primer sets due to their poor  
217 performance (Fig 2). In the soil samples, NEM and MMS detected a wide range of nematodes  
218 from different families (Figs 3 and 4). We recovered 30 nematode families using both the NEM  
219 and the MMS primer sets with 6 unique families detected by each primer set (Fig 3). We  
220 recorded 14 and 15 different unique genera in soil samples with NEM and MMS primer sets,  
221 respectively, and 23 genera were detected by both primer sets (Fig 3). We found 34 and 26  
222 unique nematode species with the NEM and MMS primer set, respectively, while 25 species  
223 were detected by both primer sets (Fig 3). We observed that the ability of the two primer sets  
224 MMS and NEM to detect nematode families were comparable expect for a limited number of  
225 nematode families e.g. Rhabditidae, Trichodoridae, Merliniidae, Heteroderidae (Fig 4 and S6  
226 Table).

227

228 **Fig 2. Relative distribution of sequence reads in soil and plant root/rhizosphere soil**  
229 **samples amplified with primer sets JB, SSU, MMS, and NEM;** percentage in the blue slide  
230 indicates the proportion of sequence reads that were assigned to Nematoda.

231

232 **Fig 3. Venn diagrams showing the number of taxa detected in soil samples by the primer**  
233 **sets MMS and NEM.** Only taxonomic assignments appearing in top hits of BLAST searches  
234 and with sequence similarities  $\geq 98\%$  and 100% coverage were considered.

235

236 **Fig 4. Relative distribution of nematode sequence reads in all soil samples amplified**  
237 **and sequenced with primer sets MMS and NEM.** Only taxonomic assignments appearing

238 in top hits of BLAST searches and with sequence similarities  $\geq 98\%$  and 100% coverage were  
239 considered.

240

## 241 **Nematode communities in plant root/rhizosphere soil** 242 **samples**

243 In plant root/rhizosphere soil samples, we recovered 16 families by the NEM primers, followed  
244 by 13 families using the MMS primer set (Fig 3). Ten families were detected by both primer  
245 sets and we recorded 10 and 9 unique genera with NEM and MMS primer sets, respectively,  
246 while 10 genera were detected by both primer sets (Fig 3). We detected 16 unique nematode  
247 species using the NEM primer set, and 9 unique species were detected using the MMS  
248 primers and 15 species were detected by both primer sets. Both primer sets detected a large  
249 variation in nematode presence in the samples, and the two primer pairs showed variation in  
250 recovered nematode taxa (Fig 5). The quinoa roots and the root knot nematode infected  
251 tomato roots were dominated by Meloidogynidae. Both primer sets detected plant parasitic  
252 and free-living nematode taxa in green bean and maize root/rhizospheres soils samples.

253

254 **Fig 5. Relative distribution of sequence reads at family rank in plant root/rhizosphere**  
255 **soil samples amplified with primer sets MMS and NEM.** Only taxonomic assignments  
256 appearing in top hits of BLAST searches and with sequence similarities  $\geq 98\%$  and 100%  
257 coverage were considered.

## 258 **Discussion**

259 Most protocols for nematode metabarcoding include a nematode extraction step to reduce  
260 DNA contamination from other soil-living organisms [17-19, 23]. This extraction step may  
261 introduce biases as particular nematode taxa or developmental stages are not necessarily  
262 extracted at the same efficiency [20]. Furthermore, extraction steps may not be practical when

263 several groups of organisms such as nematodes, fungi and bacteria are studied in the same  
264 samples. To overcome these limitations, we previously developed an amplification strategy  
265 for 454 pyrosequencing that selectively amplifies nematode DNA from total soil DNA  
266 extractions [21]. In the present study, we have adapted amplification strategies for the Illumina  
267 MiSeq platform, and we compared different primer sets for their ability to selectively amplify  
268 nematode communities.

269 We observed that the JB primer set only amplified 86% of the individual tested nematode  
270 species and did not amplify species that are agronomically important, namely *Heterodera*  
271 *carotae*, *Belonolaimus longicaudatus*, and *Ditylenchus dipsaci*. It has been reported that there  
272 are not enough reference sequences of the COI target region in the database for effective  
273 species identification [16, 17]. As previously suggested by other researchers, the COI gene  
274 has high mutation rates. Hence, the primer sequences are poorly conserved throughout the  
275 phylum Nematoda [5, 31]. Based on a study of single nematode species, mock communities,  
276 and low number of nematode sequence reads in soil and root/rhizosphere soil samples, we  
277 found that the JB primer set targeting the I3-M11 partition of the COI gene is not suitable for  
278 nematode metabarcoding.

279 In a recent study, the SSU ribosomal DNA marker (SSU\_04F/SSU\_22R) outperformed the  
280 mitochondrial marker (JB3/JB5GED) in terms of nematode species and genus level detection  
281 [17, 23]. However, in our study, important nematode species were not amplified and detected  
282 by the SSU primer set. Moreover, the amplification strategy using the SSU primer set only  
283 resulted in 1% Nematoda reads from soil and plant root/rhizosphere soil DNA samples. Our  
284 results corroborates a recent study in which the NF1/18Sr2b primer set provided better  
285 taxonomic resolutions compared to the SSU\_04F/SSU\_22R marker [17]. In other studies, this  
286 SSU primer set was found to amplify a large portion of non-nematode reads of environmental  
287 marine sediment samples [32-35]. Therefore, this primer set was not considered suitable for  
288 nematode diversity studies of environmental samples without an initial nematode extraction  
289 step.

290 Results from the analysis of the individual nematodes showed that better taxonomic resolution  
291 was achieved with MMS, which targets the V4-V5 region of 18S rRNA gene, compared to JB  
292 and SSU primer sets. The efficiency of this primer set was further confirmed using the mock  
293 communities as it was able to detect all the nematode taxa in the mock communities, also in  
294 a soil background. MMS detected a high diversity of the nematode communities in soil  
295 samples, suggesting that this newly designed primer set is well suited for studies of plant  
296 parasitic and free-living nematodes. This primer set was also able to detect many nematode  
297 families in the plant root/rhizosphere soil samples. Based on these observations, this newly  
298 designed MMS primer set is efficient for studies of soil nematode communities, and it clearly  
299 outperforms the JB and SSU primer sets.

300 The NEM primer set was previously developed for the 454-sequencing platform using a semi-  
301 nested PCR approach. However, in the present study, the second PCR in the nested PCR  
302 was omitted, which resulted in a larger PCR product (500bp) including the V6, V7, and V8  
303 regions of the 18S ribosomal RNA gene. All individual nematode species in our study were  
304 identified using NEM, and all nematode families in the mock communities were detected. In  
305 addition, NEM detected a range of diverse nematode taxa in the different soils, reflecting the  
306 different crop species that had been grown in the soils, and the different soil parameters. The  
307 NEM primer set amplified more nematode taxa in the root/rhizosphere soil samples compared  
308 to all the other primer sets tested. This primer set amplified almost 100% nematode DNA in  
309 the presence of plant DNA, which indicates that this primer set is highly nematode specific.

310 Although we detected fewer sequence reads using both MMS and NEM primer sets when we  
311 used diluted templates in the mock communities, the read counts were not reduced  
312 quantitatively. The reason for this is not known.

313 Sequence reads from taxa that belong to the family Rhabditidae were much more prevalent  
314 in the MMS than in the NEM-generated data set. This discrepancy is probably due to a three-  
315 nucleotide mismatch between 18Sr2b primer of the NEM primer set and the Rhabditidae DNA  
316 template. It was reported that the reverse primer sequence (18Sr2b) failed to amplify several

317 Rhabditidae species [36]. In a recent study, a modified version of the primer set Nemf/18Sr2b,  
318 named as NemFopt/18Sr2bRopt, was constructed by adding extra nucleotides and by  
319 including degenerate bases in both the forward and reverse primer to improve GC content and  
320 shift the reverse primer into a more conserved region of Nematoda [18]. The MMS primer set  
321 could overcome problems associated with detecting Rhabditidae species. Multiple sequence  
322 alignments (S4 Fig), detection of a higher number of taxa belonging to Rhabditidae and the  
323 greater relative abundance of Rhabditidae in soil samples in our sequence data confirmed that  
324 the MMS primer set efficiently detects Rhabditidae.

325 The MMS primer set did not detect nematode taxa of the families Aporcelaimidae,  
326 Diplogastridae, Merliniidae, Neodiplogastridae, Tylenchidae, and Tylenchulidae in  
327 root/rhizosphere soil samples, although this group of nematode taxa was detected in our soil  
328 samples. This fact could be due to the competition in primer annealing between nematode  
329 and plant DNA templates in root/rhizosphere soil samples. The NEM primer set was not able  
330 to detect the families Heteroderidae, Dolichodoridae, Telotylenchidae in the root/rhizosphere  
331 soil samples. We observed that the NEM primer set could not detect *Heterodera carotae*, *H.*  
332 *schachtii* and *Globodera* spp. neither at genus nor at species level in individual nematode  
333 species, mock communities, and mock communities in soil. On the contrary, the MMS primer  
334 set was found to be efficient in detecting nematodes belonging to Heteroderidae.

335 We propose to use both primer sets (MMS and NEM) for identification of nematode  
336 communities on DNA extracted directly from soil. Together, these two primer sets cover more  
337 than 1000 bp of the 18S rRNA gene and they capture a substantial range of the variable  
338 regions (V4, V5, V6, V7, and V8) of the 18S rRNA gene in nematodes. Moreover, the  
339 assignment of lower Linnaean taxonomies (genus, species) to sequence reads is a very  
340 crucial step in the use of DNA markers for biodiversity assessment. We conclude that our two  
341 primer sets (MMS and NEM) complement each other in detecting nematode families and can  
342 efficiently detect nematodes at the genus level and in some cases at species level.

## 343 **Acknowledgement**

344 We are grateful to Andrea M. Skantar, United State Department of Agriculture; Barbara Geric  
345 Stare, Sasa Sirca and Gregor Urek, Department of Plant Protection, Agricultural Institute of  
346 Slovenia for contributing DNA samples of nematode species. We would like to thank Susana  
347 Santos for data visualization. We would also like to thank Mathilde Schiøtt Dige and Simone  
348 Ena Rasmussen for their laboratory technical assistance.

## 349 **References**

- 350 1. Lamshead PJD, Boucher G. Marine nematode deep-sea biodiversity - Hyperdiverse or  
351 hype? *J Biogeogr.* 2003;30:475-85. doi: 10.1046/j.1365-2699.2003.00843.x.
- 352 2. De Ley P, Tandingan De Ley I, Morris K, Abebe E, Mundo-Ocampo M, Yoder M, et al. An  
353 integrated approach to fast and informative morphological vouchering of nematodes for applications  
354 in molecular barcoding. *Philosophical Transactions of the Royal Society B: Biological Sciences.*  
355 2005;360(1462):1945-58. doi: 10.1098/rstb.2005.1726.
- 356 3. Agatha S, Strüder-Kypke MC. Phylogeny of the order Choreotrichida (Ciliophora,  
357 Spirotricha, Oligotricha) as inferred from morphology, ultrastructure, ontogenesis, and SSrRNA gene  
358 sequences. *Eur J Protistol.* 2007;43(1):37-63. doi: 10.1016/j.ejop.2006.10.001.
- 359 4. Abebe E, Mekete T, Thomas W. A critique of current methods in nematode taxonomy.  
360 *African Journal of Biotechnology.* 2013;10(3):312-23. doi: 10.4314/ajb.v10i3.
- 361 5. Blouin MS, Yowell CA, Courtney CH, Dame JB. Substitution bias, rapid saturation, and  
362 the use of mtDNA for nematode systematics. *Molecular Biology and Evolution.* 1998;15(12):1719-27.  
363 doi: 10.1093/oxfordjournals.molbev.a025898.
- 364 6. Derycke S, Remerie T, Vierstraete A, Backeljau T, Vanfleteren J, Vincx M, et al.  
365 Mitochondrial DNA variation and cryptic speciation within the free-living marine nematode *Pellioiditis*  
366 *marina*. *Mar Ecol Prog Ser.* 2005;300:91-103. doi: 10.3354/meps300091.
- 367 7. Derycke S, Vanaverbeke J, Rigaux A, Backeljau T, Moens T. Exploring the use of  
368 cytochrome oxidase c subunit 1 (COI) for DNA barcoding of free-living marine nematodes. *PLoS One.*  
369 2010;5(10):e13716. doi: 10.1371/journal.pone.0013716. PubMed PMID: 21060838.
- 370 8. Morise H, Miyazaki E, Yoshimitsu S, Eki T. Profiling nematode communities in  
371 unmanaged flowerbed and agricultural field soils in Japan by DNA barcode sequencing. *PLoS One.*  
372 2012;7(12):e51785. doi: 10.1371/journal.pone.0051785.
- 373 9. Janssen T, Karssen G, Verhaeven M, Coyne D, Bert W. Mitochondrial coding genome  
374 analysis of tropical root-knot nematodes (*Meloidogyne*) supports haplotype based diagnostics and  
375 reveals evidence of recent reticulate evolution. *Sci Rep.* 2016;6:22591. doi: 10.1038/srep22591.
- 376 10. Sánchez-Monge A, Janssen T, Fang Y, Couvreur M, Karssen G, Bert W. mtCOI  
377 successfully diagnoses the four main plant-parasitic *Aphelenchoides* species (Nematoda:  
378 *Aphelenchoididae*) and supports a multiple origin of plant-parasitism in this paraphyletic genus.  
379 *European Journal of Plant Pathology.* 2017;148(4):853-66. doi: 10.1007/s10658-016-1141-1.



- 380 11. Janssen T, Karssen G, Orlando V, Subbotin SA, Bert W. Molecular characterization and  
381 species delimiting of plant-parasitic nematodes of the genus *Pratylenchus* from the penetrans group  
382 (Nematoda: Pratylenchidae). *Mol Phylogen Evol.* 2017;117:30-48. doi: 10.1016/j.ympev.2017.07.027.
- 383 12. Van Megen H, Van Den Elsen S, Holterman M, Karssen G, Mooyman P, Bongers T, et al.  
384 A phylogenetic tree of nematodes based on about 1200 full-length small subunit ribosomal DNA  
385 sequences. *Nematology.* 2009;11(6):927-50. doi: 10.1163/156854109X456862.
- 386 13. Correia MTdS, Rieger TT, Ley PD, Decraemer W, Esteves AM, Genevois VF, et al. Marine  
387 nematode taxonomy in the age of DNA: the present and future of molecular tools to assess their  
388 biodiversity. *Nematology.* 2010;12(5):661-72. doi: 10.1163/138855410X500073.
- 389 14. Tang CQ, Leasi F, Obertegger U, Kieneke A, Barraclough TG, Fontaneto D. The widely  
390 used small subunit 18S rDNA molecule greatly underestimates true diversity in biodiversity surveys of  
391 the meiofauna. *PNAS.* 2012;109(40):16208-12. doi: 10.1073/pnas.1209160109.
- 392 15. Morgan MJ, Bass D, Bik H, Birky CW, Blaxter M, Crisp MD, et al. A critique of Rossberg  
393 et al.: noise obscures the genetic signal of microbiotal ecospecies in ecogenomic datasets. *Proceedings*  
394 *of the Royal Society B: Biological Sciences.* 2014;281(1783):20133076. doi: 10.1098/rspb.2013.3076.
- 395 16. Avó AP, Daniell TJ, Neilson R, Oliveira S, Branco J, Adão H. DNA Barcoding and  
396 Morphological Identification of Benthic Nematodes Assemblages of Estuarine Intertidal Sediments:  
397 Advances in Molecular Tools for Biodiversity Assessment. *Frontiers in Marine Science.* 2017;4:66. doi:  
398 [org/10.3389/fmars.2017.00066](https://doi.org/10.3389/fmars.2017.00066).
- 399 17. Ahmed M, Black MA, Prior T, Karssen G, Lawson R, Adams I, et al. Metabarcoding of soil  
400 nematodes: the importance of taxonomic coverage and availability of reference sequences in  
401 choosing suitable marker(s). *Metabarcoding and Metagenomics.* 2019;3:77-99. doi:  
402 [10.3897/mbmg.3.36408](https://doi.org/10.3897/mbmg.3.36408).
- 403 18. Waeyenberge L, de Sutter N, Viaene N, Haegeman A. New insights into nematode DNA-  
404 metabarcoding as revealed by the characterization of artificial and spiked nematode communities.  
405 *Diversity.* 2019;11(4):52. doi: 10.3390/d11040052.
- 406 19. Treonis AM, Unangst SK, Kepler RM, Buyer JS, Cavigelli MA, Mirsky SB, et al.  
407 Characterization of soil nematode communities in three cropping systems through morphological and  
408 DNA metabarcoding approaches. *Sci Rep.* 2018;8:2004. doi: 10.1038/s41598-018-20366-5.
- 409 20. Verschoor BC, de Goede RGM. The nematode extraction efficiency of the Oostenbrink  
410 elutriator-cottonwool filter method with special reference to nematode body size and life strategy.  
411 *Nematology.* 2000;2:325-42. doi: [Doi 10.1163/156854100509204](https://doi.org/10.1163/156854100509204). PubMed PMID:  
412 WOS:000089943000009.
- 413 21. Sapkota R, Nicolaisen M. High-throughput sequencing of nematode communities from  
414 total soil DNA extractions. *BMC Ecol.* 2015;15(3):1-8. doi: 10.1186/s12898-014-0034-4.
- 415 22. Hadziavdic K, Lekang K, Lanzen A, Jonassen I, Thompson EM, Troedsson C.  
416 Characterization of the 18s rRNA gene for designing universal eukaryote specific primers. *PLoS One.*  
417 2014;9(2):e87624. doi: 10.1371/journal.pone.0087624.
- 418 23. Macheriotou L, Guilini K, Bezerra TN, Tytgat B, Nguyen DT, Phuong Nguyen TX, et al.  
419 Metabarcoding free-living marine nematodes using curated 18S and CO1 reference sequence  
420 databases for species-level taxonomic assignments. *Ecol Evol.* 2019;9(1):1-16. doi:  
421 [10.1002/ece3.4814](https://doi.org/10.1002/ece3.4814).
- 422 24. Sapkota R, Nicolaisen M. Cropping history shapes fungal, oomycete and nematode  
423 communities in arable soils and affects cavity spot in carrot. *Agric Ecosyst Environ.* 2018;257:120-31.  
424 doi: 10.1016/j.agee.2018.01.032. PubMed PMID: WOS:000428005800013.
- 425 25. Derycke S, Vanaverbeke J, Rigaux A, Backeljau T, Moens T. Exploring the use of  
426 cytochrome oxidase c subunit 1 (COI) for DNA barcoding of free-living marine nematodes. *PLoS One.*  
427 2010. doi: 10.1371/journal.pone.0013716. PubMed PMID: 21060838.

- 428 26. Blaxter ML, De Ley P, Garey JR, Llu LX, Scheldeman P, Vierstraete A, et al. A molecular  
429 evolutionary framework for the phylum Nematoda. *Nature*. 1998. doi: 10.1038/32160.
- 430 27. Rognes T, Flouri T, Nichols B, Quince C, Mahé F. VSEARCH: a versatile open source tool  
431 for metagenomics. *PeerJ*. 2016;4:e2584. doi: 10.7717/peerj.2584.
- 432 28. Yilmaz P, Parfrey LW, Yarza P, Gerken J, Pruesse E, Quast C, et al. The SILVA and "all-  
433 species Living Tree Project (LTP)" taxonomic frameworks. *Nucleic Acids Res*. 2014;42(Database):D643–  
434 D8. doi: 10.1093/nar/gkt1209.
- 435 29. Quast C, Pruesse E, Yilmaz P, Gerken J, Schweer T, Yarza P, et al. The SILVA ribosomal  
436 RNA gene database project: Improved data processing and web-based tools. *Nucleic Acids Res*.  
437 2013;41(Database):D590–D6. doi: 10.1093/nar/gks1219.
- 438 30. Caporaso JG, Kuczynski J, Stombaugh J, Bittinger K, Bushman FD, Costello EK, et al.  
439 QIIME allows analysis of high-throughput community sequencing data Intensity normalization  
440 improves color calling in SOLiD sequencing. *Nat Methods*. 2010;7(5):335–6. doi: 10.1038/nmeth0510-  
441 335. PubMed PMID: 20383131.
- 442 31. Deagle BE, Jarman SN, Coissac E, Pompanon F, Taberlet P. DNA metabarcoding and the  
443 cytochrome c oxidase subunit I marker: not a perfect match. *Biol Lett*. 2014;10(9):20140562. Epub  
444 2014/09/12. doi: 10.1098/rsbl.2014.0562. PubMed PMID: 25209199; PubMed Central PMCID:  
445 PMC4190964.
- 446 32. Creer S, Fonseca VG, Porazinska DL, Giblin-Davis RM, Sung W, Power DM, et al.  
447 Ultrasequencing of the meiofaunal biosphere: Practice, pitfalls and promises. *Mol Ecol*.  
448 2010;19(Supplementary 1):4–20. doi: 10.1111/j.1365-294X.2009.04473.x.
- 449 33. Fonseca VG, Carvalho GR, Nichols B, Quince C, Johnson HF, Neill SP, et al. Metagenetic  
450 analysis of patterns of distribution and diversity of marine meiobenthic eukaryotes. *Global Ecol*  
451 *Biogeogr*. 2014;23:1293–302. doi: 10.1111/geb.12223.
- 452 34. Bik HM, Sung W, De Ley P, Baldwin JG, Sharma J, Rocha-Olivares A, et al. Metagenetic  
453 community analysis of microbial eukaryotes illuminates biogeographic patterns in deep-sea and  
454 shallow water sediments. *Mol Ecol*. 2012;21(5):1048-59. doi: 10.1111/j.1365-294X.2011.05297.x.
- 455 35. Capra E, Giannico R, Montagna M, Turri F, Cremonesi P, Strozzi F, et al. A new primer  
456 set for DNA metabarcoding of soil Metazoa. *Eur J Soil Biol*. 2016;77:53-9. doi:  
457 10.1016/j.ejsobi.2016.10.005.
- 458 36. Darby BJ, Todd TC, Herman MA. High-throughput amplicon sequencing of rRNA genes  
459 requires a copy number correction to accurately reflect the effects of management practices on soil  
460 nematode community structure. *Mol Ecol*. 2013;22(21):5456-71. Epub 2013/10/10. doi:  
461 10.1111/mec.12480. PubMed PMID: 24103081.
- 462 37. Sapkota R, Nicolaisen M. High-throughput sequencing of nematode communities from  
463 total soil DNA extractions. *BMC Ecology*. 2015. doi: 10.1186/s12898-014-0034-4.
- 464 38. Porazinska DL, Giblin-Davis RM, Faller L, Farmerie W, Kanzaki N, Morris K, et al.  
465 Evaluating high-throughput sequencing as a method for metagenomic analysis of nematode diversity.  
466 *Mol Ecol Resour*. 2009;9(6):1439-50. doi: 10.1111/j.1755-0998.2009.02611.x.

467

468

469

470

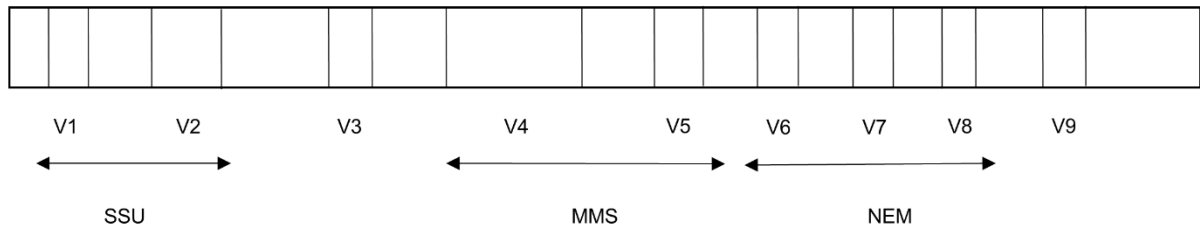

471

472 **Fig 1. Location of metabarcoding primers targeting variable regions in 18S rRNA gene**

473 **used in the present study.**

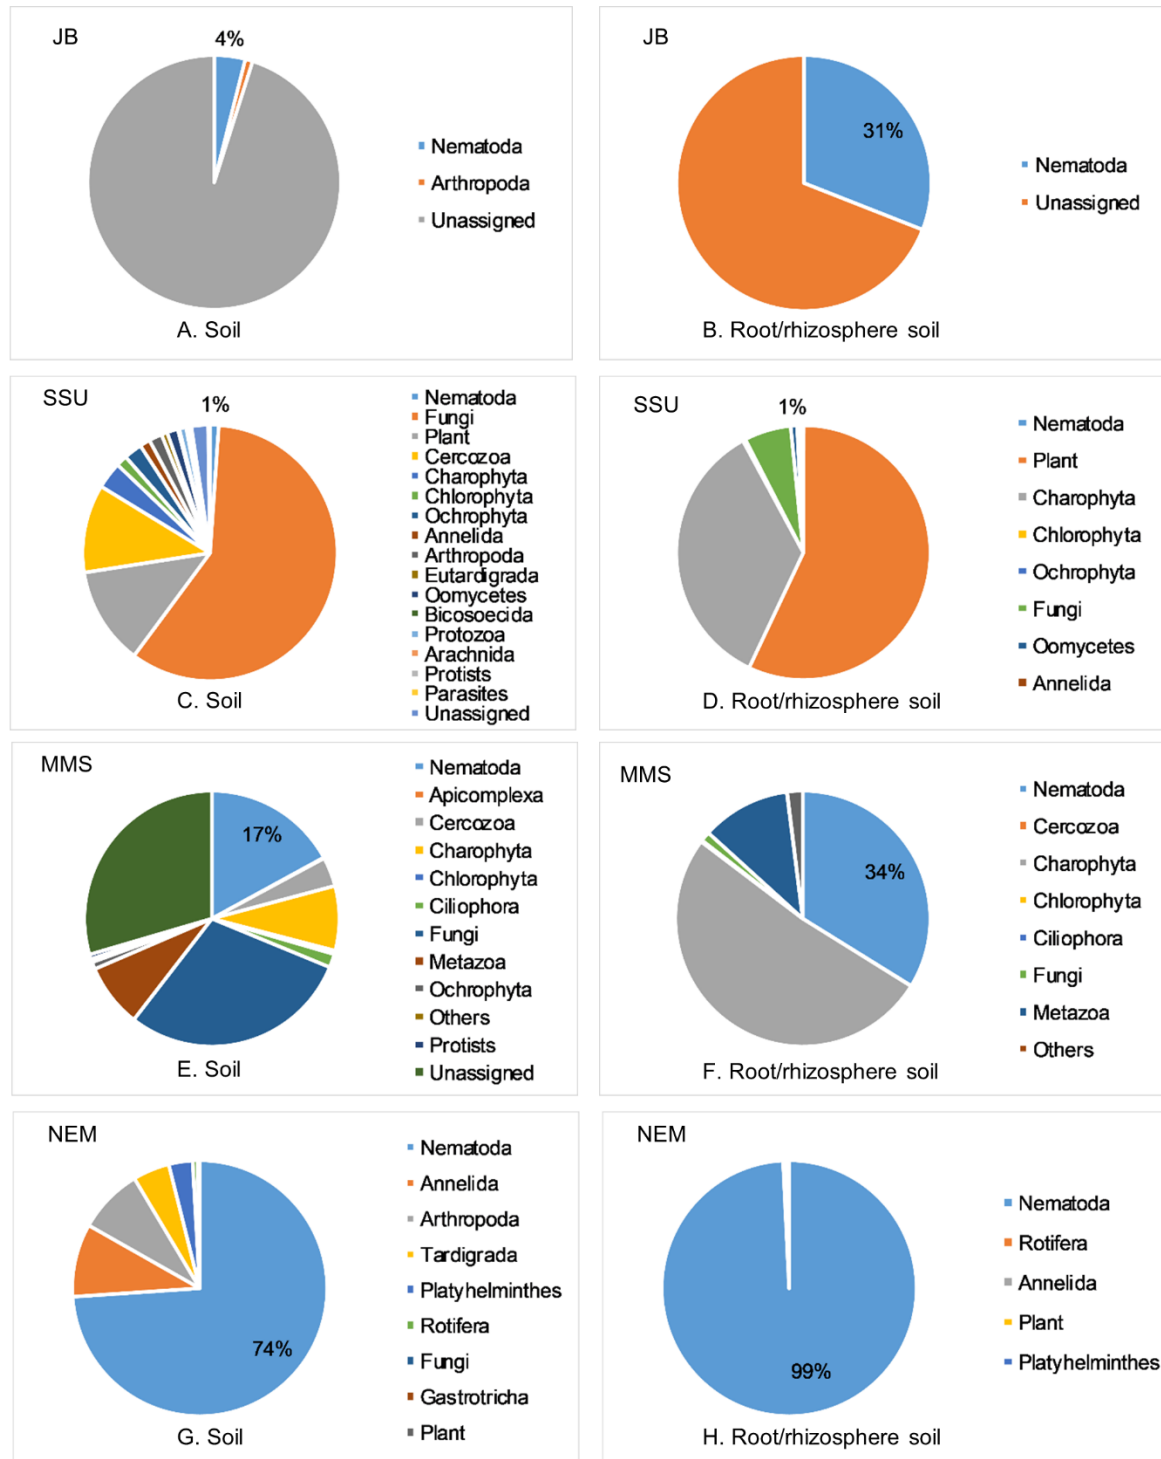

474

475 **Fig 2. Relative distribution of sequence reads in soil and plant root/rhizosphere soil**  
 476 **samples amplified with primer sets JB, SSU, MMS, and NEM; percentage in the blue slide**  
 477 **indicates the proportion of sequence reads that were assigned to Nematoda.**

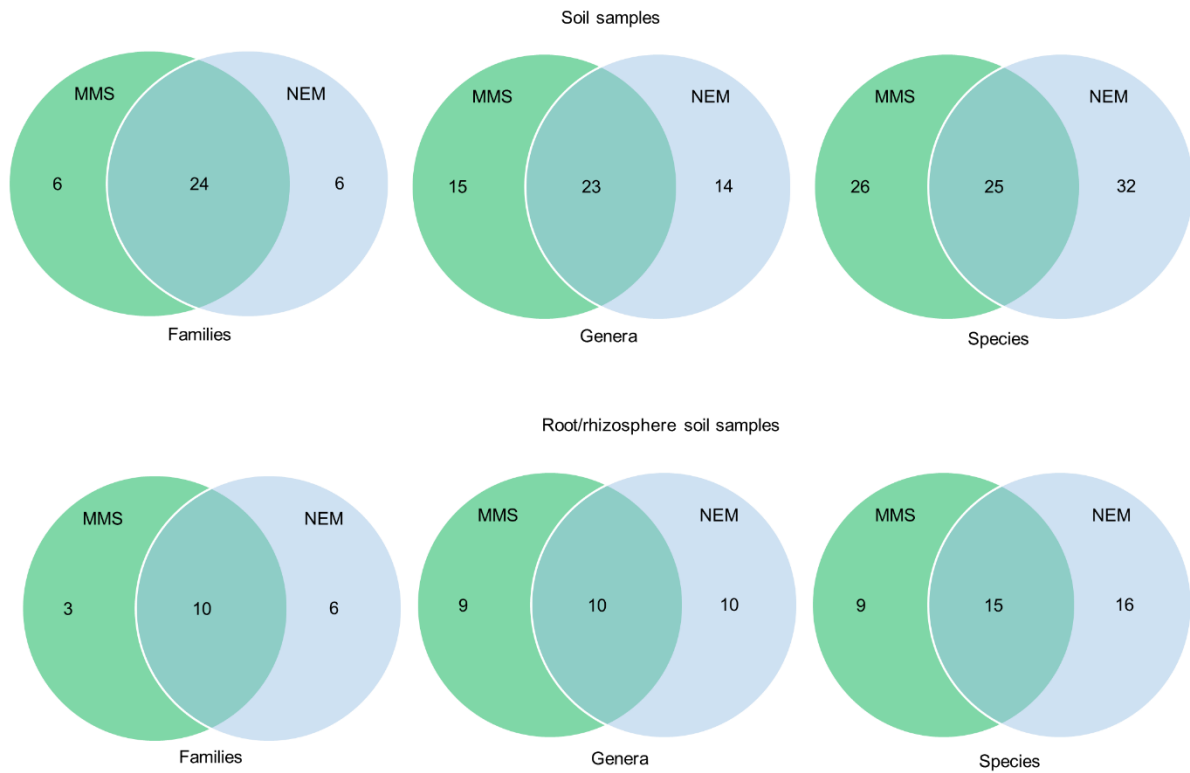

478

479

**Fig 3. Venn diagrams showing the number of taxa detected in soil samples by the primer**

480

**sets MMS and NEM.** Only taxonomic assignments appearing in top hits of BLAST searches

481

and with sequence similarities  $\geq 98\%$  and 100% coverage were considered.

482

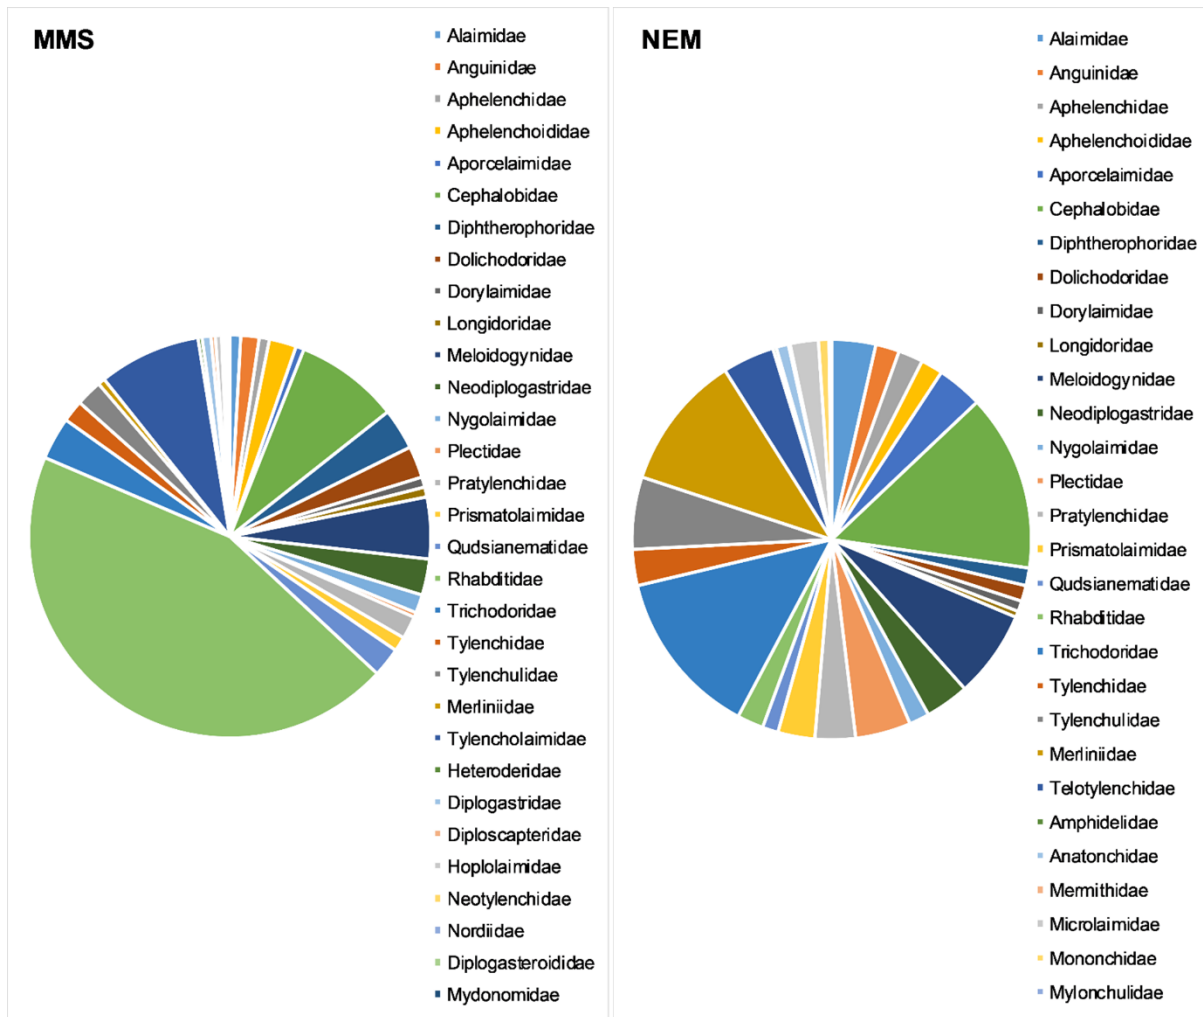

483

484

485

486

487

488

**Fig 4. Relative distribution of nematode sequence reads in all soil samples amplified and sequenced with primer sets MMS and NEM. Only taxonomic assignments appearing in top hits of BLAST searches and with sequence similarities  $\geq 98\%$  and 100% coverage were considered.**

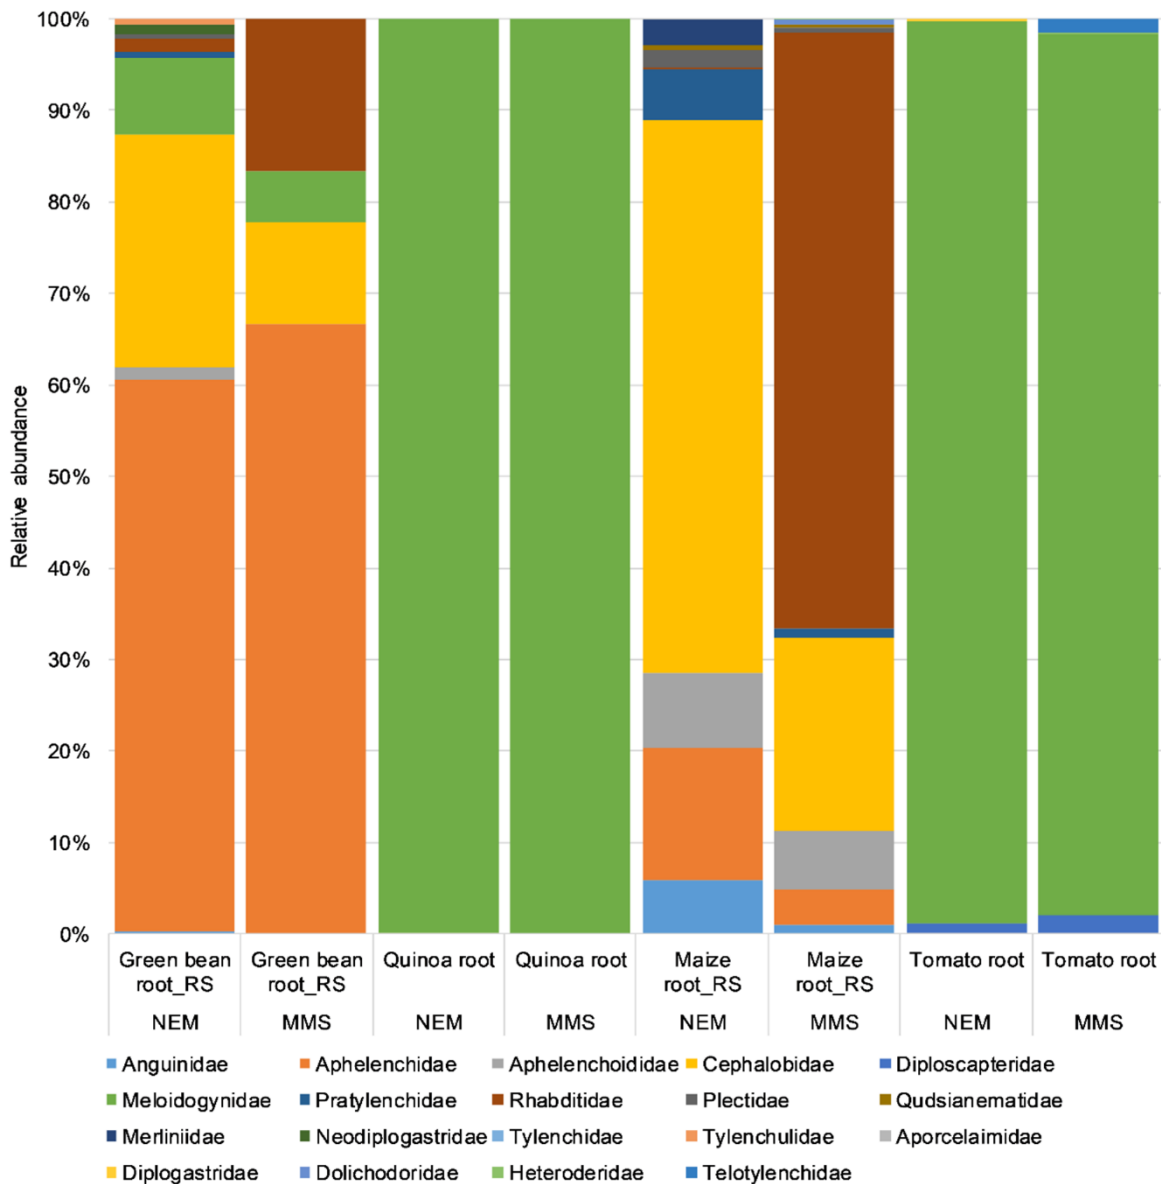

489

490 **Fig 5. Relative distribution of sequence reads at family rank in plant root/rhizosphere**

491 **soil samples amplified with primer sets MMS and NEM. Only taxonomic assignments**

492 appearing in top hits of BLAST searches and with sequence similarities  $\geq 98\%$  and 100%

493 coverage were considered.

494

495

496

497

498

## Supporting information

499

500 **S1 Table. Metabarcoding primer sets used in the present study**

| <b>Primer code</b> | <b>Nucleotide sequence (5'-3')</b> | <b>Amplicon length (bp)</b> | <b>Reference</b> |
|--------------------|------------------------------------|-----------------------------|------------------|
| <b>Nemf</b>        | GGGAAGTATGGTTGCAAA                 | 500                         | [37]             |
| <b>18Sr2b</b>      | TACAAAGGGCAGGGACGTAAT              |                             | [38]             |
| <b>MMSF</b>        | GGTGCCAGCAGCCGCGGTA                | 550                         | This study       |
| <b>MMSR</b>        | CTTTAAGTTTCAGCTTTGC                |                             | This study       |
| <b>SSU_04F</b>     | GCTTGTCTCAAAGATTAAGCC              | 360                         | [26]             |
| <b>SSU_22R</b>     | GCCTGCTGCCTTCCTTGGGA               |                             |                  |
| <b>JB3</b>         | TTTTTTGGGCATCCTGAGGTTTAT           | 400                         | [25]             |
| <b>JB5</b>         | AGCACCTAAACTTAAAACATAATGAAAATG     |                             |                  |

501

502

503

504

505

506

507

508

509

510

511

512

513



514 **S2 Table. List of individual nematode species, DNA extraction method and order of the**  
 515 **species used in the study**

|            | <b>Nematode taxa</b>              | <b>DNA extraction method</b> | <b>Order</b> |
|------------|-----------------------------------|------------------------------|--------------|
| <b>1.</b>  | <i>Meloidogyne incognita</i>      | Qiasafe                      | Tylenchida   |
| <b>2.</b>  | <i>Meloidogyne arenaria</i>       | Qiasafe                      | Tylenchida   |
| <b>3.</b>  | <i>Meloidogyne nassi</i>          | DNeasy                       | Tylenchida   |
| <b>4.</b>  | <i>Meloidogyne minor</i>          | Qiasafe                      | Tylenchida   |
| <b>5.</b>  | <i>Meloidogyne javanica</i>       | Worm lysis buffer            | Tylenchida   |
| <b>6.</b>  | <i>Meloidogyne graminicola</i>    | Worm lysis buffer            | Tylenchida   |
| <b>7.</b>  | <i>Meloidogyne fallax</i>         | Qiasafe                      | Tylenchida   |
| <b>8.</b>  | <i>Meloidogyne chitwoodi</i>      | DNeasy                       | Tylenchida   |
| <b>9.</b>  | <i>Meloidogyne ulmi</i>           | DNeasy                       | Tylenchida   |
| <b>10.</b> | Mixed <i>Meloidogyne</i> spp.     | Worm lysis buffer            | Tylenchida   |
| <b>11.</b> | <i>Meloidogyne enterolobi</i>     | Worm lysis buffer            | Tylenchida   |
| <b>12.</b> | <i>Meloidogyne inornata</i>       | Worm lysis buffer            | Tylenchida   |
| <b>13.</b> | <i>Meloidogyne ethiopica</i>      | Worm lysis buffer            | Tylenchida   |
| <b>14.</b> | <i>Meloidogyne luci</i>           | Worm lysis buffer            | Tylenchida   |
| <b>15.</b> | <i>Belonolaimus longicaudatus</i> | Qiasafe                      | Tylenchida   |
| <b>16.</b> | <i>Pratylenchus penetrans</i>     | DNeasy                       | Tylenchida   |
| <b>17.</b> | <i>Pratylenchus neglectus</i>     | Worm lysis buffer            | Tylenchida   |
| <b>18.</b> | <i>Heterodera schachtii</i>       | Qiasafe                      | Tylenchida   |
| <b>19.</b> | <i>Heterodera carotae</i>         | Qiasafe                      | Tylenchida   |
| <b>20.</b> | <i>Caenorhabditis elegans</i>     | DNeasy                       | Rhabditida   |
| <b>21.</b> | <i>Ditylenchus dipsaci</i>        | Worm lysis buffer            | Tylenchida   |
| <b>22.</b> | <i>Bursaphelenchus mucronatus</i> | Worm lysis buffer            | Aphelenchida |

516

517

518

519

520

521 **S3 Table. Composition of mock communities used in the study**

|               | Nematode taxa                                                                          | Nematode taxa         | Nematode taxa                     | Nematode taxa                 | Nematode taxa               | Nematode taxa                 |
|---------------|----------------------------------------------------------------------------------------|-----------------------|-----------------------------------|-------------------------------|-----------------------------|-------------------------------|
| <b>Mock1</b>  | <i>Meloidogyne hapla</i>                                                               | <i>Globodera</i> spp. | <i>Belonolaimus longicaudatus</i> | <i>Pratylenchus penetrans</i> | <i>Heterodera carotae</i>   | <i>Caenorhabditis elegans</i> |
| <b>Mock2</b>  | <i>Meloidogyne incognita</i>                                                           | <i>Globodera</i> spp. | <i>B. longicaudatus</i>           | <i>P. penetrans</i>           | <i>Heterodera schachtii</i> | <i>C. elegans</i>             |
| <b>Mock3</b>  | <i>Meloidogyne arenaria</i>                                                            | <i>Globodera</i> spp. | <i>B. longicaudatus</i>           | <i>P. penetrans</i>           | <i>H. carotae</i>           | <i>C. elegans</i>             |
| <b>Mock4</b>  | <i>Meloidogyne minor</i>                                                               | <i>Globodera</i> spp  | <i>B. longicaudatus</i>           | <i>P. penetrans</i>           | <i>H.schachtii</i>          | <i>C. elegans</i>             |
| <b>Mock5</b>  | <i>Meloidogyne fallax</i>                                                              | <i>Globodera</i> spp  | <i>B. longicaudatus</i>           | <i>P. penetrans</i>           | <i>H. carotae</i>           | <i>C. elegans</i>             |
| <b>Mock6</b>  | <i>Meloidogyne chitwoodi</i>                                                           | <i>Globodera</i> spp  | <i>B. longicaudatus</i>           | <i>P. penetrans</i>           | <i>H.schachtii</i>          | <i>C. elegans</i>             |
| <b>Mock7</b>  | <i>Meloidogyne ulmi</i> +<br><i>Meloidogyne nassi</i>                                  | <i>Globodera</i> spp  | <i>B. longicaudatus</i>           | <i>P. penetrans</i>           | <i>H. carotae</i>           | <i>C. elegans</i>             |
| <b>Mock8</b>  | <i>Meloidogyne inornata</i><br>+Mixed <i>Meloidogyne</i> spp.                          | <i>Globodera</i> spp  | <i>B. longicaudatus</i>           | <i>P. penetrans</i>           | <i>H.schachtii</i>          | <i>C. elegans</i>             |
| <b>Mock9</b>  | <i>Meloidogyne ethiopica</i><br>+Mixed <i>Meloidogyne</i> spp.                         | <i>Globodera</i> spp  | <i>B. longicaudatus</i>           | <i>P. penetrans</i>           | <i>H. carotae</i>           | <i>C. elegans</i>             |
| <b>Mock10</b> | <i>Meloidogyne luci</i> +<br><i>Meloidogyne inornata</i>                               | <i>Globodera</i> spp  | <i>B. longicaudatus</i>           | <i>P. penetrans</i>           | <i>H.schachtii</i>          | <i>C. elegans</i>             |
| <b>Mock11</b> | <i>Meloidogyne hapla</i>                                                               | <i>Globodera</i> spp  | <i>B. longicaudatus</i>           | <i>P. penetrans</i>           | <i>H. carotae</i>           | <i>C. elegans</i>             |
| <b>Mock12</b> | <i>Meloidogyne incognita</i>                                                           | <i>Globodera</i> spp  | <i>B. longicaudatus</i>           | <i>P. penetrans</i>           | <i>H.schachtii</i>          | <i>C. elegans</i>             |
| <b>Mock13</b> | <i>Meloidogyne arenaria</i>                                                            | <i>Globodera</i> spp  | <i>B. longicaudatus</i>           | <i>P. penetrans</i>           | <i>H. carotae</i>           | <i>C. elegans</i>             |
| <b>Mock14</b> | <i>Meloidogyne minor</i>                                                               | <i>Globodera</i> spp  | <i>B. longicaudatus</i>           | <i>P. penetrans</i>           | <i>H.schachtii</i>          | <i>C. elegans</i>             |
| <b>Mock15</b> | <i>Meloidogyne fallax</i>                                                              | <i>Globodera</i> spp  | <i>B. longicaudatus</i>           | <i>P. penetrans</i>           | <i>H. carotae</i>           | <i>C. elegans</i>             |
| <b>Mock16</b> | <i>Meloidogyne chitwoodi</i>                                                           | <i>Globodera</i> spp  | <i>B. longicaudatus</i>           | <i>P. penetrans</i>           | <i>H. schachtii</i>         | <i>C. elegans</i>             |
| <b>Mock17</b> | Mixed <i>Meloidogyne</i> spp. + <i>Meloidogyne nassi</i> + <i>Meloidogyne inornata</i> | <i>Globodera</i> spp  | <i>B. longicaudatus</i>           | <i>P. penetrans</i>           | <i>H. carotae</i>           | <i>C. elegans</i>             |
| <b>Mock18</b> | <i>Meloidogyne inornata</i>                                                            | <i>Globodera</i> spp  | <i>B. longicaudatus</i>           | <i>P. penetrans</i>           | <i>H. schachtii</i>         | <i>C. elegans</i>             |
| <b>Mock19</b> | <i>Meloidogyne ethiopica</i>                                                           | <i>Globodera</i> spp  | <i>B. longicaudatus</i>           | <i>P. penetrans</i>           | <i>H. carotae</i>           | <i>C. elegans</i>             |
| <b>Mock20</b> | <i>Meloidogyne luci</i>                                                                | <i>Globodera</i> spp  | <i>B. longicaudatus</i>           | <i>P. penetrans</i>           | <i>H. schachtii</i>         | <i>C. elegans</i>             |

522 Blue font indicates 1:10 dilution of template DNA

523 **S4 Table. Cropping history and soil properties of twenty different soils used in the study**

| <b>Soil ID</b> | <b>Previous crops</b> | <b>Year of sampling</b> | <b>Status</b> | <b>Soil type</b>   | <b>pH</b> |
|----------------|-----------------------|-------------------------|---------------|--------------------|-----------|
| <b>Soil-1</b>  | Carrot                | 2012                    | NA            | NA                 | NA        |
| <b>Soil-2</b>  | Strawberry            | 2012                    | NA            | NA                 | NA        |
| <b>Soil-3</b>  | Spinach               | 2014                    | NA            | NA                 | NA        |
| <b>Soil-4</b>  | Maize                 | 2018                    | Conventional  | <i>clayey sand</i> | 6.0       |
| <b>Soil-5</b>  | Beans                 | 2018                    | Conventional  | <i>clayey sand</i> | 5.9       |
| <b>Soil-6</b>  | Triticale             | 2013                    | Conventional  | <i>heavy clay</i>  | 5.8       |
| <b>Soil-7</b>  | Corn                  | 2014                    | Conventional  | <i>heavy clay</i>  | 6.3       |
| <b>Soil-8</b>  | Iceberg lettuce       | 2018                    | Conventional  | <i>clayey sand</i> | 6.3       |
| <b>Soil-9</b>  | Rye                   | 2013                    | Conventional  | <i>heavy clay</i>  | 5.9       |
| <b>Soil-10</b> | Rye                   | 2014                    | Organic       | <i>clay</i>        | 6.0       |
| <b>Soil-11</b> | Barley                | 2013                    | Organic       | <i>clayey sand</i> | 5.2       |
| <b>Soil-12</b> | Barley                | 2014                    | Conventional  | <i>heavy clay</i>  | 6.5       |
| <b>Soil-13</b> | Wheat                 | 2013                    | Conventional  | <i>heavy clay</i>  | 6.5       |
| <b>Soil-14</b> | Wheat                 | 2014                    | Conventional  | <i>coarse sand</i> | 6.1       |
| <b>Soil-15</b> | Potato                | 2013                    | Conventional  | <i>heavy clay</i>  | 5.4       |
| <b>Soil-16</b> | Potato                | 2014                    | Conventional  | <i>heavy clay</i>  | 5.5       |
| <b>Soil-17</b> | Clover                | 2013                    | Organic       | <i>heavy clay</i>  | 5.7       |
| <b>Soil-18</b> | Clover                | 2014                    | Organic       | <i>coarse sand</i> | 6.1       |
| <b>Soil-19</b> | Oat                   | 2013                    | Organic       | <i>heavy clay</i>  | 5.9       |
| <b>Soil-20</b> | Oat                   | 2014                    | Organic       | <i>heavy clay</i>  | 6.0       |

524 NA indicates not analysed

525

526 **S5 Table. The efficiency of four metabarcoding primers in the detection of nematodes**  
 527 **from different families in twenty different soil mock communities.**

| <b>Families</b>          | <b>JB</b> | <b>SSU</b> | <b>MMS</b> | <b>NEM</b> |
|--------------------------|-----------|------------|------------|------------|
| <b>Alaimidae</b>         | ND        | D          | D          | D          |
| <b>Amphidelidae</b>      | ND        | ND         | ND         | D          |
| <b>Anatonchidae</b>      | ND        | ND         | ND         | D          |
| <b>Anguinidae</b>        | ND        | ND         | D          | D          |
| <b>Aphelenchidae</b>     | ND        | ND         | D          | D          |
| <b>Aphelenchoididae</b>  | ND        | ND         | D          | D          |
| <b>Aporcelaimidae</b>    | ND        | ND         | D          | D          |
| <b>Axonolaimidae</b>     | ND        | D          | ND         | ND         |
| <b>Bastianiidae</b>      | ND        | D          | ND         | ND         |
| <b>Cephalobidae</b>      | ND        | D          | D          | D          |
| <b>Diplopeltidae</b>     | ND        | D          | ND         | ND         |
| <b>Diphtherophoridae</b> | ND        | D          | D          | D          |
| <b>Diplogasteridae</b>   | ND        | ND         | ND         | D          |
| <b>*Dolichodoridae</b>   | ND        | ND         | D          | D          |
| <b>Dorylaimidae</b>      | ND        | ND         | D          | D          |
| <b>*Heteroderidae</b>    | D         | D          | D          | D          |
| <b>Longidoridae</b>      | ND        | ND         | ND         | D          |
| <b>*Meloidogynidae</b>   | D         | D          | D          | D          |
| <b>Merliniidae</b>       | ND        | ND         | ND         | D          |
| <b>Mermithidae</b>       | ND        | ND         | ND         | D          |
| <b>Microlaimidae</b>     | ND        | ND         | ND         | D          |

|                          |           |    |            |            |
|--------------------------|-----------|----|------------|------------|
| <b>Monhysteridae</b>     | ND        | D  | ND         | ND         |
| <b>Mononchidae</b>       | ND        | ND | ND         | D          |
| <b>Mydonomidae</b>       | ND        | ND | D          | ND         |
| <b>Mylonchulidae</b>     | ND        | ND | ND         | D          |
| <b>Neodiplogastridae</b> | ND        | ND | D          | D          |
| <b>Nygolaimidae</b>      | ND        | ND | D          | D          |
| <b>Plectidae</b>         | ND        | D  | ND         | D          |
| <b>*Pratylenchidae</b>   | D         | ND | D          | D          |
| <b>Prismatolaimidae</b>  | ND        | D  | D          | D          |
| <b>Qudsianematidae</b>   | ND        | ND | D          | D          |
| <b>*Rhabditidae</b>      | D         | D  | D          | D          |
| <b>Telotylenchidae</b>   | ND        | ND | D          | D          |
| <b>Trichodoridae</b>     | ND        | D  | ND         | D          |
| <b>Tylenchidae</b>       | ND        | ND | D          | D          |
| <b>Tylenchulidae</b>     | ND        | ND | D          | D          |
| <b>Unassigned</b>        | Above 70% | -  | Negligible | Negligible |

528 Here, D denotes amplified and detected, ND denotes not detected, \* denotes the families were  
 529 abundant in soil-mock samples.

530

531

532

533

534

535

536

537

538

539

540

541

542 **S6 Table. Efficiency of four metabarcoding primers in detection of nematodes from**  
 543 **twenty different soils at lower taxonomic rank than family level.**

| <b>Taxa</b>                      | <b>JB</b> | <b>SSU</b> | <b>MMS</b> | <b>NEM</b> |
|----------------------------------|-----------|------------|------------|------------|
| <b>Achromadoridae</b>            | ND        | D          | ND         | ND         |
| <i>Achromadora</i> sp.           |           | G          |            |            |
| <i>Achromadora ruricola</i>      |           | S          |            |            |
| <b>Alaimidae</b>                 | ND        | D          | D          | D          |
| <i>Alaimus</i> sp.               |           | G          | G          | G          |
| <i>Alaimus arcuatus</i>          |           |            |            | S          |
| <i>Alaimus parvus</i>            |           |            |            | S          |
| <b>Anatonchidae</b>              | ND        | ND         | ND         | D          |
| <i>Anatonchus tridentatus</i>    |           |            |            | S          |
| <b>Anguinidae</b>                | ND        | ND         | D          | D          |
| <i>Ditylenchus</i> sp.           |           |            | G          | G          |
| <i>Ditylenchus dipsaci</i>       |           |            |            | S          |
| <i>Ditylenchus destructor</i>    |           |            |            | S          |
| <b>Aphelenchidae</b>             | ND        | ND         | D          | D          |
| <i>Aphelenchus avenae</i>        |           |            | S          | S          |
| <b>Aphelenchoididae</b>          | ND        | ND         | D          | D          |
| <i>Aphelenchoides</i> sp.        |           |            | G          |            |
| <i>Aphelenchoides parietinus</i> |           |            | S          | S          |
| <i>Aphelenchoides bicaudatus</i> |           |            | S          | S          |
| <i>Seinura demani</i>            |           |            |            | S          |
| <b>Aporcelaimidae</b>            | ND        | ND         | D          | D          |

|                                          |    |   |    |    |
|------------------------------------------|----|---|----|----|
| <b><i>Aporcelaimellus</i> sp.</b>        |    |   | G  | G  |
| <b>Bastianiidae</b>                      | ND | D | ND | ND |
| <b><i>Bastiania gracilis</i></b>         |    | S |    |    |
| <b>Cephalobidae</b>                      | ND | D | D  | D  |
| <b><i>Acrobeles complexus</i></b>        |    | S | S  | S  |
| <b><i>Acrobeles ctenocephalus</i></b>    |    |   |    | S  |
| <b><i>Acrobeles ciliatus</i></b>         |    | S |    | S  |
| <b><i>Acrobeloides</i> sp.</b>           |    | G | G  | G  |
| <b><i>Acrobeloides thornei</i></b>       |    | S |    |    |
| <b><i>Acrobeloides apiculatus</i></b>    |    | S |    |    |
| <b><i>Acrobeloides varius</i></b>        |    |   |    | S  |
| <b><i>Chiloplacus propinquus</i></b>     |    | S | S  |    |
| <b><i>Eucephalobus</i> sp.</b>           |    |   |    | G  |
| <b><i>Eucephalobus striatus</i></b>      |    | S | S  | S  |
| <b><i>Eucephalobus oxyuroides</i></b>    |    | S | S  |    |
| <b><i>Heterocephalobus elongatus</i></b> |    |   | S  |    |
| <b><i>Pseudacrobeles</i> sp.</b>         |    |   |    | G  |
| <b>Diplopeltidae</b>                     | ND | D | ND | ND |
| <b><i>Cylindrolaimus communis</i></b>    |    | S |    |    |
| <b>Diphtherophoridae</b>                 | ND | D | D  | D  |
| <b><i>Diphtherophora</i> sp.</b>         |    | G | G  | G  |
| <b><i>Diphtherophora communis</i></b>    |    | S | S  |    |
| <b><i>Tylolaimophorus typicus</i></b>    |    | S |    |    |

|                                |    |    |    |    |
|--------------------------------|----|----|----|----|
| <b>Diplogasteridae</b>         | ND | D  | ND | ND |
| <i>Butlerius butleri</i>       |    | S  |    |    |
| <b>Diplogasteroididae</b>      | ND | ND | D  | ND |
| <i>Diplogasteroides sp.</i>    |    |    | G  |    |
| <b>Diploscapteridae</b>        | ND | ND | D  | ND |
| <i>Diploscapter sp.</i>        |    |    | G  |    |
| <b>Dolichodoridae</b>          | ND | ND | D  | D  |
| <i>Merlinius sp</i>            |    |    |    | G  |
| <i>Merlinius nanus</i>         |    |    | S  |    |
| <b>Dorylaimidae</b>            | ND | ND | D  | D  |
| <i>Mesodorylaimus bastiani</i> |    |    | S  |    |
| <i>Prodorylaimus sp.</i>       |    |    |    | G  |
| <i>Thonus circulifer</i>       |    |    | S  | S  |
| <b>Heteroderidae</b>           | D  | ND | D  | ND |
| <i>Globodera pallida</i>       | S  |    | S  |    |
| <i>Globodera rostochiensis</i> | S  |    |    |    |
| <b>Hoplolaimidae</b>           | ND | ND | D  | ND |
| <i>Helicotylenchus minzi</i>   |    |    | S  |    |
| <b>Longidoridae</b>            | ND | ND | D  | D  |
| <i>Longidorus sp.</i>          |    |    | G  |    |
| <i>Longidorus attenuatus</i>   |    |    |    | S  |
| <b>Meloidogynidae</b>          | D  | D  | D  | D  |
| <i>Meloidogyne sp.</i>         | G  | G  | G  | G  |



|                                         |    |    |    |    |
|-----------------------------------------|----|----|----|----|
| <b><i>Meloidogyne hapla</i></b>         |    |    | S  | S  |
| <b>Merliniidae</b>                      | ND | ND | *D | ND |
| <b>Microlaimidae</b>                    | ND | ND | ND | D  |
| <b><i>Prodesmodora circulata</i></b>    |    |    |    | S  |
| <b>Mylonchulidae</b>                    | ND | ND | ND | D  |
| <b><i>Mylonchulus hawaiiensis</i></b>   |    |    |    | S  |
| <b>Mononchidae</b>                      | ND | ND | ND | D  |
| <b><i>Clarkus papillatus</i></b>        |    |    |    | S  |
| <b>Monhysteridae</b>                    | ND | D  | ND | ND |
| <b><i>Eumonhystera</i> sp.</b>          |    | G  |    |    |
| <b><i>Eumonhystera vulgaris</i></b>     |    | S  |    |    |
| <b><i>Eumonhystera hungarica</i></b>    |    | S  |    |    |
| <b><i>Geomonhystera</i> sp.</b>         |    | G  |    |    |
| <b>Mydonomidae</b>                      | ND | ND | D  | ND |
| <b><i>Dorylaimoides micoletzkyi</i></b> |    |    | S  |    |
| <b>Neodiplogastridae</b>                | ND | ND | D  | D  |
| <b><i>Mononchoides americanus</i></b>   |    |    | S  |    |
| <b><i>Pristionchus</i> sp.</b>          |    |    | G  | G  |
| <b><i>Pristionchus Iheritieri</i></b>   |    |    |    | S  |
| <b>Neotylenchidae</b>                   | ND | ND | D  | ND |
| <b><i>Rubzovinema</i> sp.</b>           |    |    | G  |    |
| <b>Nordiidae</b>                        | ND | ND | D  | ND |
| <b><i>Pungentus</i> sp.</b>             |    |    | G  |    |

|                                   |    |    |    |   |
|-----------------------------------|----|----|----|---|
| <b>Nygolaimidae</b>               | ND | ND | D  | D |
| <i>Nygolaimus brachyuris</i>      |    |    | S  | S |
| <b>Plectidae</b>                  | ND | D  | ND | D |
| <i>Plectus</i> sp.                |    |    |    | G |
| <i>Plectus minimus</i>            |    | S  |    |   |
| <i>Plectus aquatilis</i>          |    | S  |    |   |
| <i>Anaplectus porosus</i>         |    | S  |    | S |
| <i>Tylocephalus auriculatus</i>   |    | S  |    |   |
| <i>Wilsonema otophorum</i>        |    | S  |    |   |
| <b>Pratylenchidae</b>             | D  | ND | D  | D |
| <i>Pratylenchus thornei</i>       |    |    | S  | S |
| <i>Pratylenchus crenatus</i>      |    |    | S  | S |
| <i>Pratylenchus penetrans</i>     |    |    | S  | S |
| <i>Pratylenchus neglectus</i>     |    |    | S  | S |
| <i>Pratylenchus fallax</i>        | S  |    |    |   |
| <b>Prismatolaimidae</b>           | ND | D  | D  | D |
| <i>Prismatolaimus</i> sp.         |    |    |    | G |
| <i>Prismatolaimus dolichurus</i>  |    | S  | S  |   |
| <i>Prismatolaimus intermedius</i> |    | S  | S  |   |
| <b>Qudsianematidae</b>            | ND | ND | D  | D |
| <i>Microdorylaimus miser</i>      |    |    |    | S |
| <i>Ecumenicus monohystera</i>     |    |    | S  | S |
| <b>Rhabditidae</b>                | D  | ND | D  | D |

|                                           |    |    |    |    |
|-------------------------------------------|----|----|----|----|
| <b><i>Rhabditis</i> sp.</b>               |    |    | G  | G  |
| <b><i>Pelodera</i> sp.</b>                |    |    | G  |    |
| <b><i>Pelodera teres</i></b>              |    |    |    | S  |
| <b><i>Pellioditis</i> sp.</b>             |    |    |    | G  |
| <b><i>Pellioditis marina</i></b>          | S  |    |    |    |
| <b><i>Mesorhabditis</i> sp.</b>           |    |    | G  |    |
| <b><i>Mesorhabditis belari</i></b>        |    |    | S  |    |
| <b><i>Caenorhabditis elegans</i></b>      | S  |    |    |    |
| <b>Steinernematidae</b>                   | ND | D  | ND | ND |
| <b><i>Steinernema affine</i></b>          |    | S  |    |    |
| <b>Telotylenchidae</b>                    | ND | D  | D  | D  |
| <b><i>Tylenchorhynchus maximus</i></b>    |    |    | S  | S  |
| <b><i>Tylenchorhynchus dubius</i></b>     |    |    | S  | S  |
| <b><i>Tylenchorhynchus teeni</i></b>      |    | S  |    |    |
| <b>Trichodoridae</b>                      | ND | D  | D  | D  |
| <b><i>Trichodorus primitivus</i></b>      |    | S  | S  | S  |
| <b><i>Trichodorus viruliferus</i></b>     |    | S  |    |    |
| <b><i>Paratrichodorus pachydermus</i></b> |    |    | S  | S  |
| <b><i>Paratrichodorus allius</i></b>      |    | S  |    |    |
| <b>Tylenchidae</b>                        | ND | ND | D  | D  |
| <b><i>Filenchus</i> sp.</b>               |    |    |    | G  |
| <b><i>Filenchus aquilonius</i></b>        |    |    |    | S  |
| <b><i>Coslenchus turkeyensis</i></b>      |    |    | S  |    |

|                                          |    |    |   |    |
|------------------------------------------|----|----|---|----|
| <b><i>Basiria sp.</i></b>                |    |    |   | G  |
| <b><i>Basiria duplexa</i></b>            |    |    | S |    |
| <b>Tylenchulidae</b>                     | ND | ND | D | D  |
| <b><i>Paratylenchus sp.</i></b>          |    |    |   | G  |
| <b><i>Paratylenchus conicephalus</i></b> |    |    |   | S  |
| <b><i>Paratylenchus similis</i></b>      |    |    |   | S  |
| <b><i>Paratylenchus nanus</i></b>        |    |    | S |    |
| <b><i>Paratylenchus projectus</i></b>    |    |    | S |    |
| <b>Tylencholaimidae</b>                  | ND | ND | D | ND |
| <b><i>Tylencholaimus sp.</i></b>         |    |    | G |    |

544 Here, G: genus level detection, S: species level detection, D: detected at lower taxonomic  
545 level, \*D: detected at family level only, ND: not amplified and detected at any taxonomic level.  
546 Classification was based on Nemaplex database (<http://nemaplex.ucdavis.edu/> Accessed on  
547 11/11/2019); NCBI Blast tool was used for taxonomic assignments, and top hits with sequence  
548 similarities  $\geq 99\%$  and coverage 100% were considered for taxonomic assignment at species  
549 level.

550

551

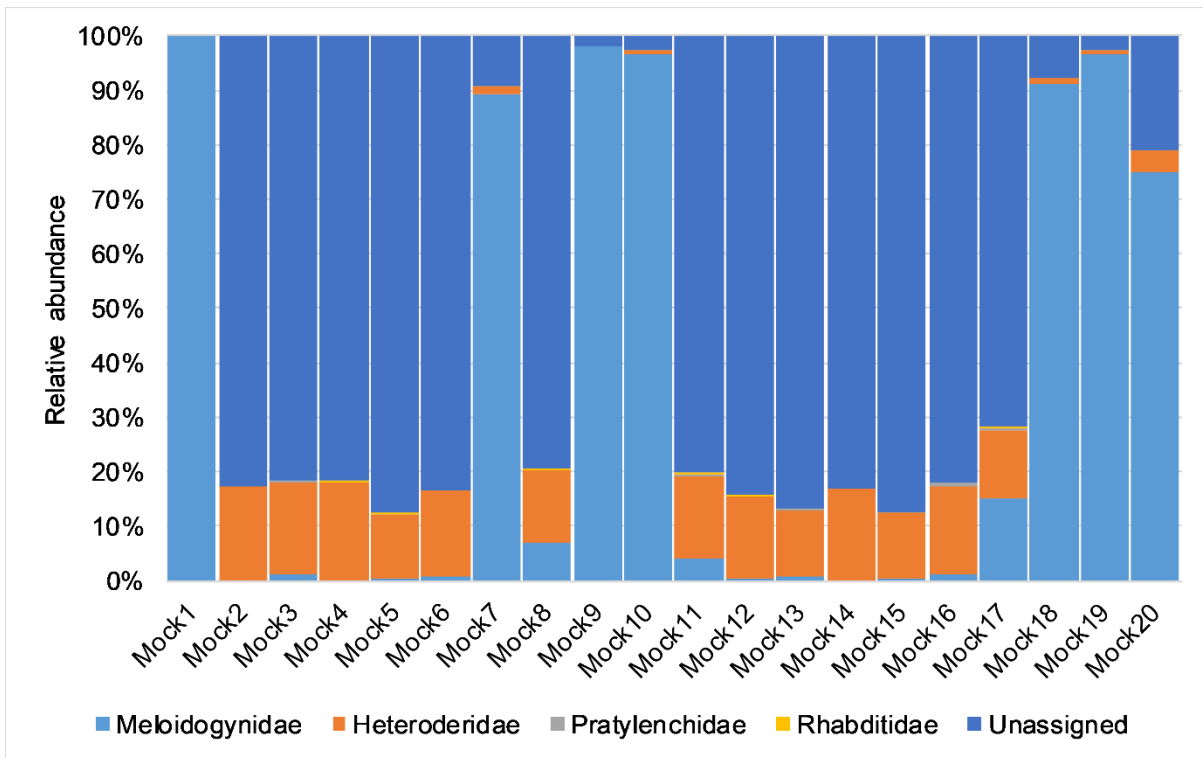

552

553

**S1 Fig. Relative abundance of sequence reads at family rank in mock samples amplified**

554

**and sequenced using JB primer set. Only taxonomic assignments appearing in top hits and**

555

**with sequence similarities  $\geq 99\%$  and coverage 100% were considered.**

556

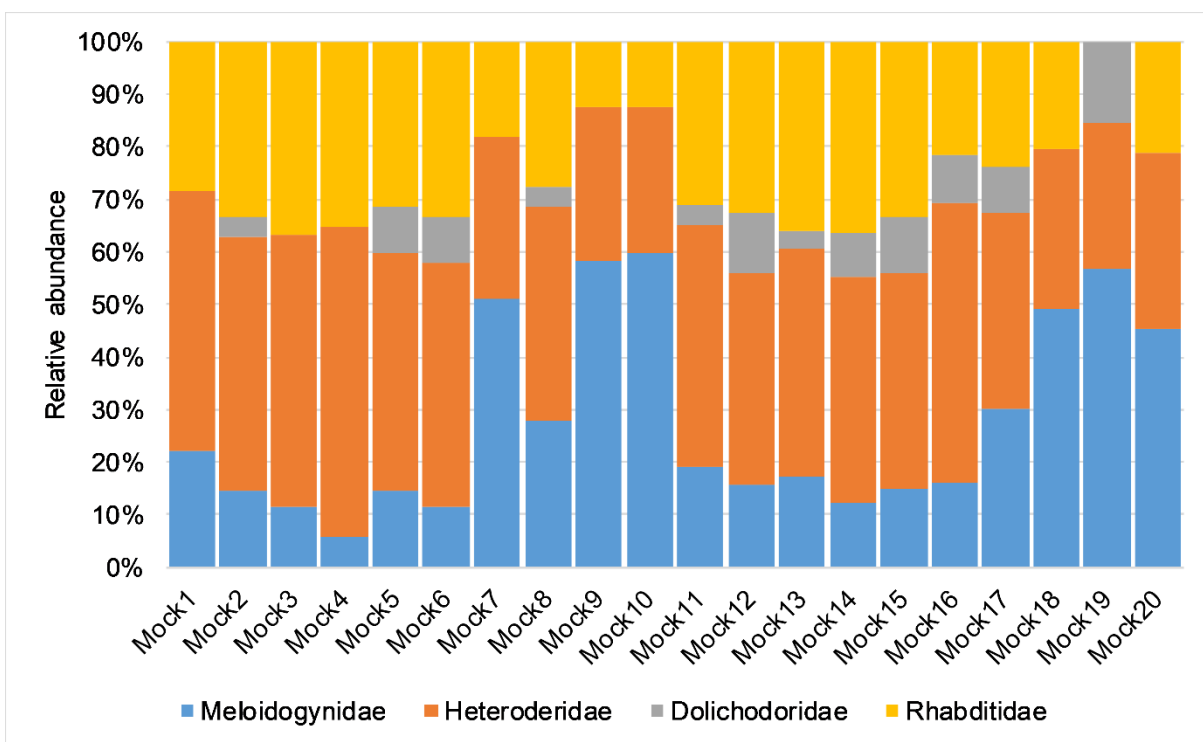

557

558 **S2 Fig. Relative abundance of sequence reads at family rank in mock samples amplified**  
559 **and sequenced using MMS primer set.** Only taxonomic assignments appearing in top hits  
560 and with sequence similarities  $\geq 99\%$  and coverage 100% were considered.

561

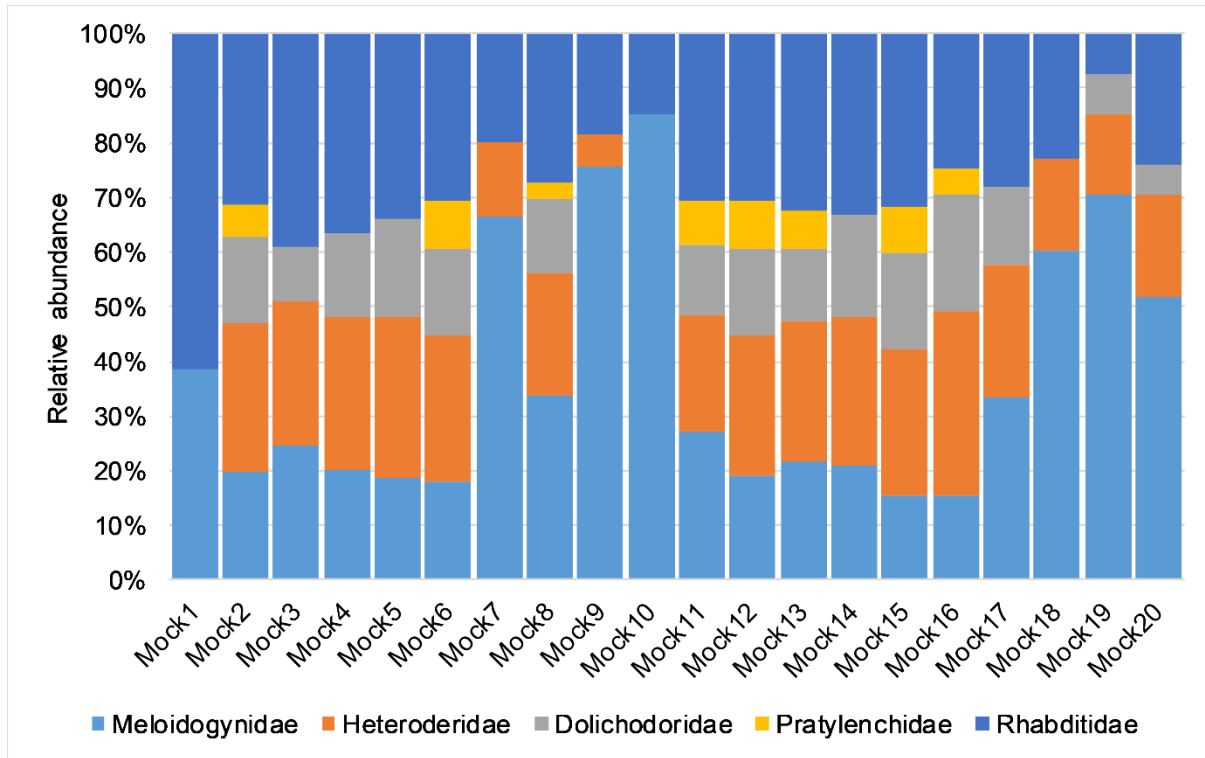

562

563 **S3 Fig. Relative abundance of sequence reads at family rank in mock samples amplified**  
564 **and sequenced using NEM primer set.** Only taxonomic assignments appearing in top hits  
565 and with sequence similarities  $\geq 99\%$  and coverage 100% were considered.

566

567

568

569

570

571

572

573 **S4 Fig. Multiple sequence alignment of MMS and NEM primer sets and representative**  
574 **taxa of Rhabditidae**

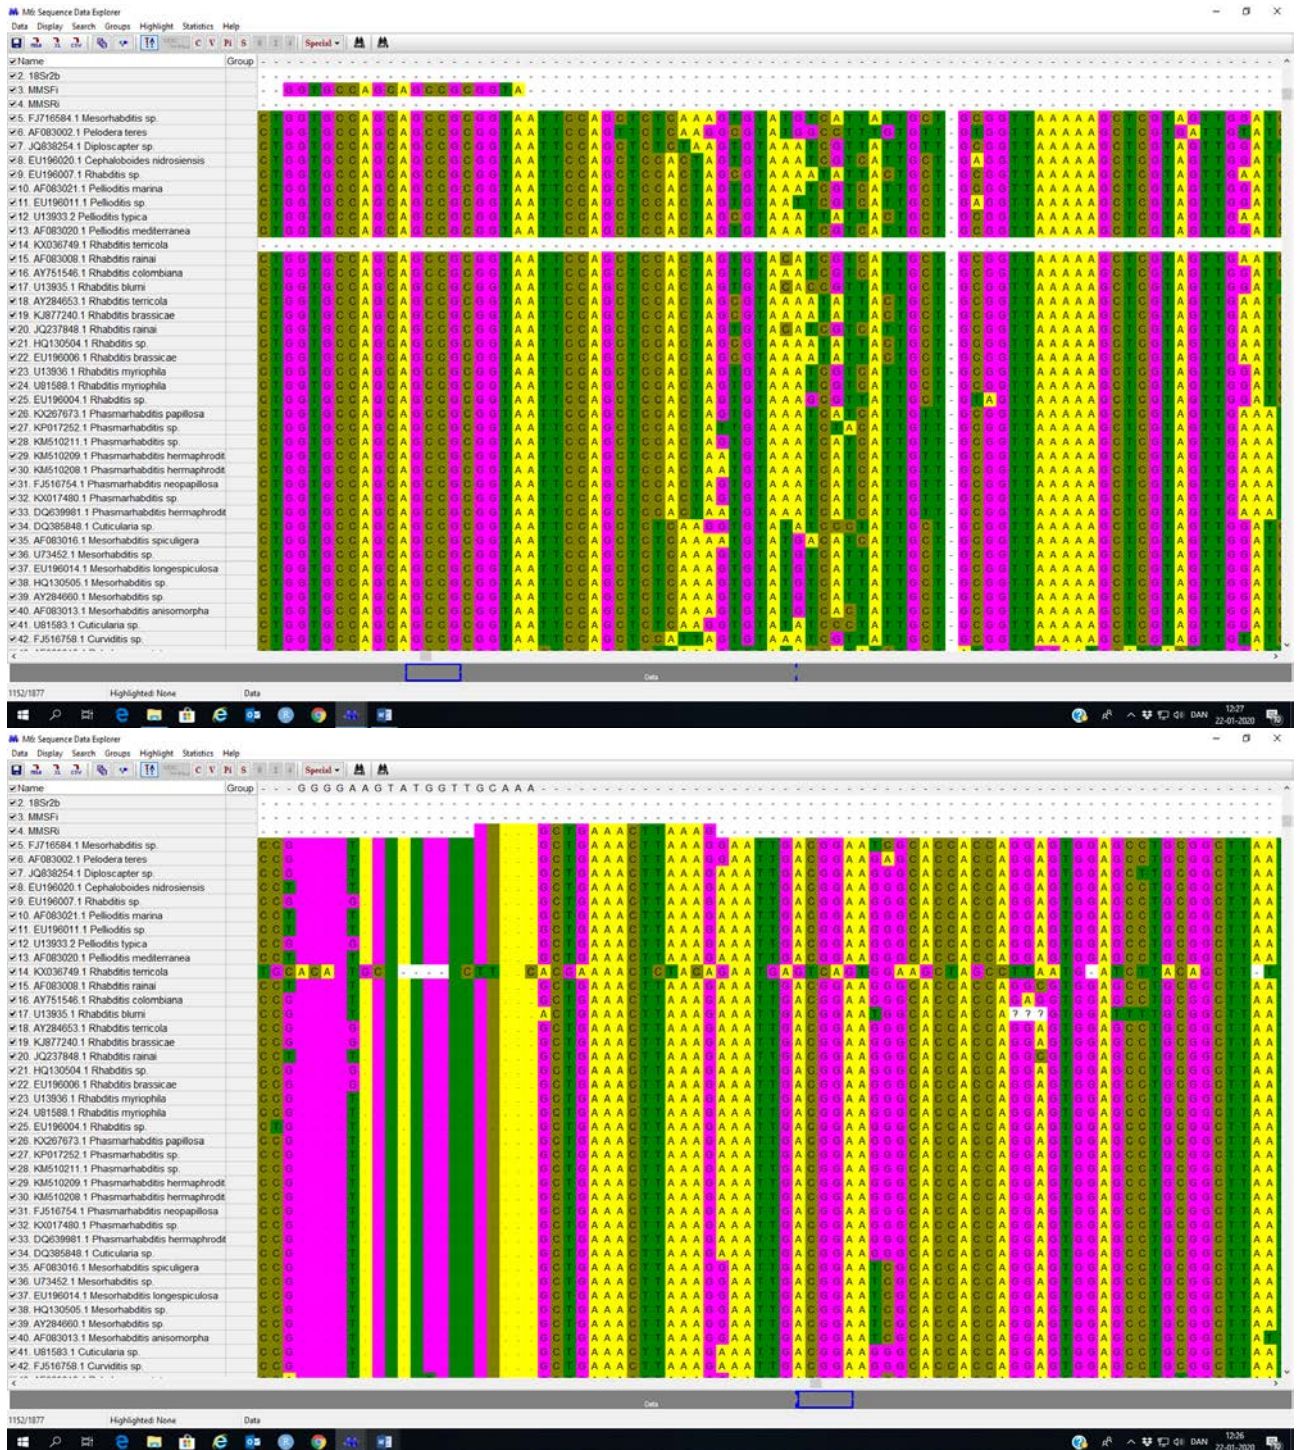

575

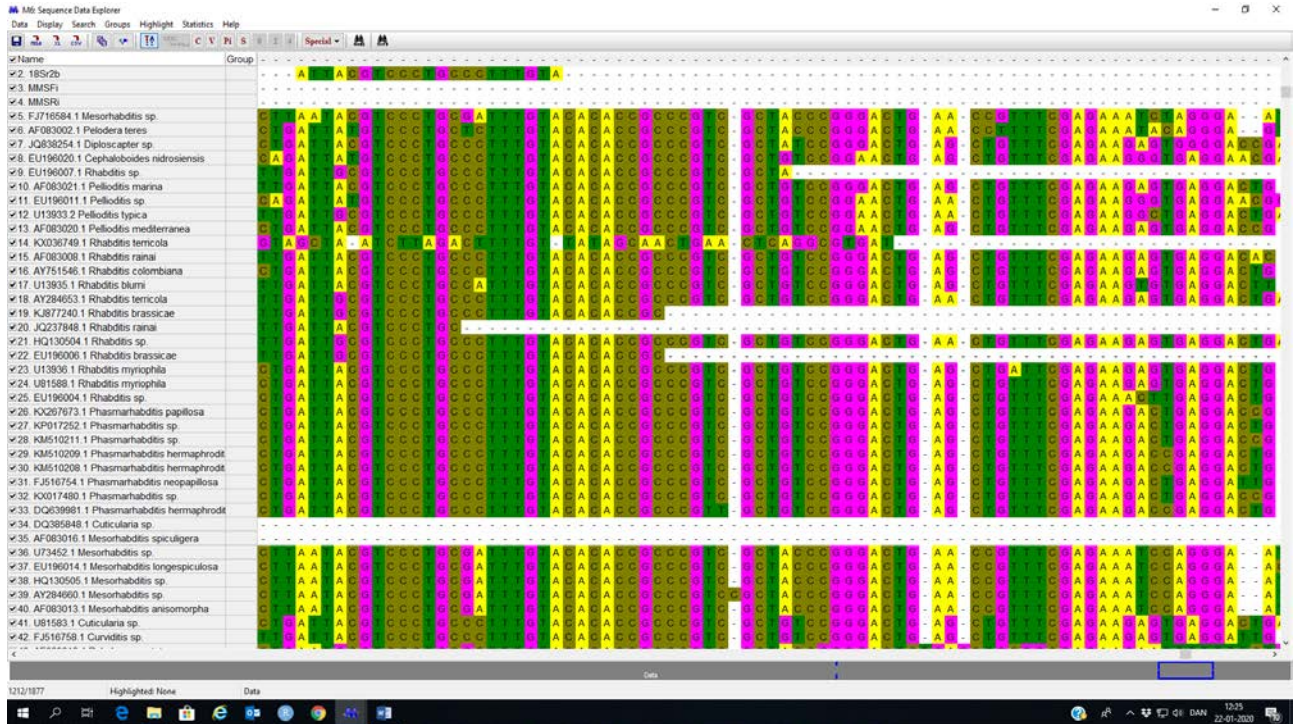

576

577

578
